# Supplementary material
Source: publisher figshare collection journal article supplement (https://tandf.figshare.com/ndownloader/files/16909388)
Supplement: Supplementary file 1 [file 16909388]

New phenolic glycosides from *Polygonum cuspidatum*

Jianshuang Jiang1, Fushuang Li1, Ziming Feng, Yanan Yang, Peicheng Zhang *

*State Key Laboratory of Bioactive Substance and Function of Natural Medicines, Institute of Materia Medica, Chinese Academy of Medical Sciences and Peking Union Medical College, Beijing 100050, People’s Republic of China*

**Supporting Information**

**1. Figure**

**Figure S1**.　 IR spectrum of polyphthaliside A (**1**)

**Figure S2.**　 HR-ESI-MS spectrum of polyphthaliside A (**1**)

**Figure S3.**　 1H NMR spectrum of polyphthaliside A **1**) in DMSO-*d6*

**Figure S4.**　 13C NMR spectrum of polyphthaliside A (**1**) in DMSO-*d6*

**Figure S5.**　 HSQC NMR spectrum of polyphthaliside A (**1**) in DMSO-*d6*

**Figure S6.**　 HMBC NMR spectrum of polyphthaliside A (**1**) in DMSO-*d6*

**Figure S7.**　IR spectrum of polyphthaliside B (**2**)

**Figure S8.**HR-ESI-MS spectrum of polyphthaliside B (**2**)

**Figure S9.**　1H NMR spectrum of polyphthaliside B (**2**) in DMSO-*d6*

**Figure S10.**　13C NMR spectrum of polyphthaliside B (**2**) in DMSO-*d6*

**Figure S11.**　HSQC NMR spectrum of polyphthaliside B (**2**) in DMSO-*d6*

**Figure S12.**　HMBC NMR spectrum of polyphthaliside B (**2**) in DMSO-*d6*

**Figure S13.**　IR spectrum of polyisocoumarin (**3**)

**Figure S14.**HR-ESI-MS spectrum of polyisocoumarin (**3**)

**Figure S15.**　1H NMR spectrum of polyisocoumarin (**3**) in DMSO-*d6*

**Figure S16.**　13C NMR spectrum of polyisocoumarin (**3**)in DMSO-*d6*

**Figure S17.**　HSQC NMR spectrum of polyisocoumarin (**3**) in DMSO-*d6*

**Figure S18.**　HMBC NMR spectrum of polyisocoumarin (**3**) in DMSO-*d6*

**2. Activity assay method**

**2.1. *PTP1B inhibition***

**2.2. *Cytotoxic activity assay***

**1. Figure**

**
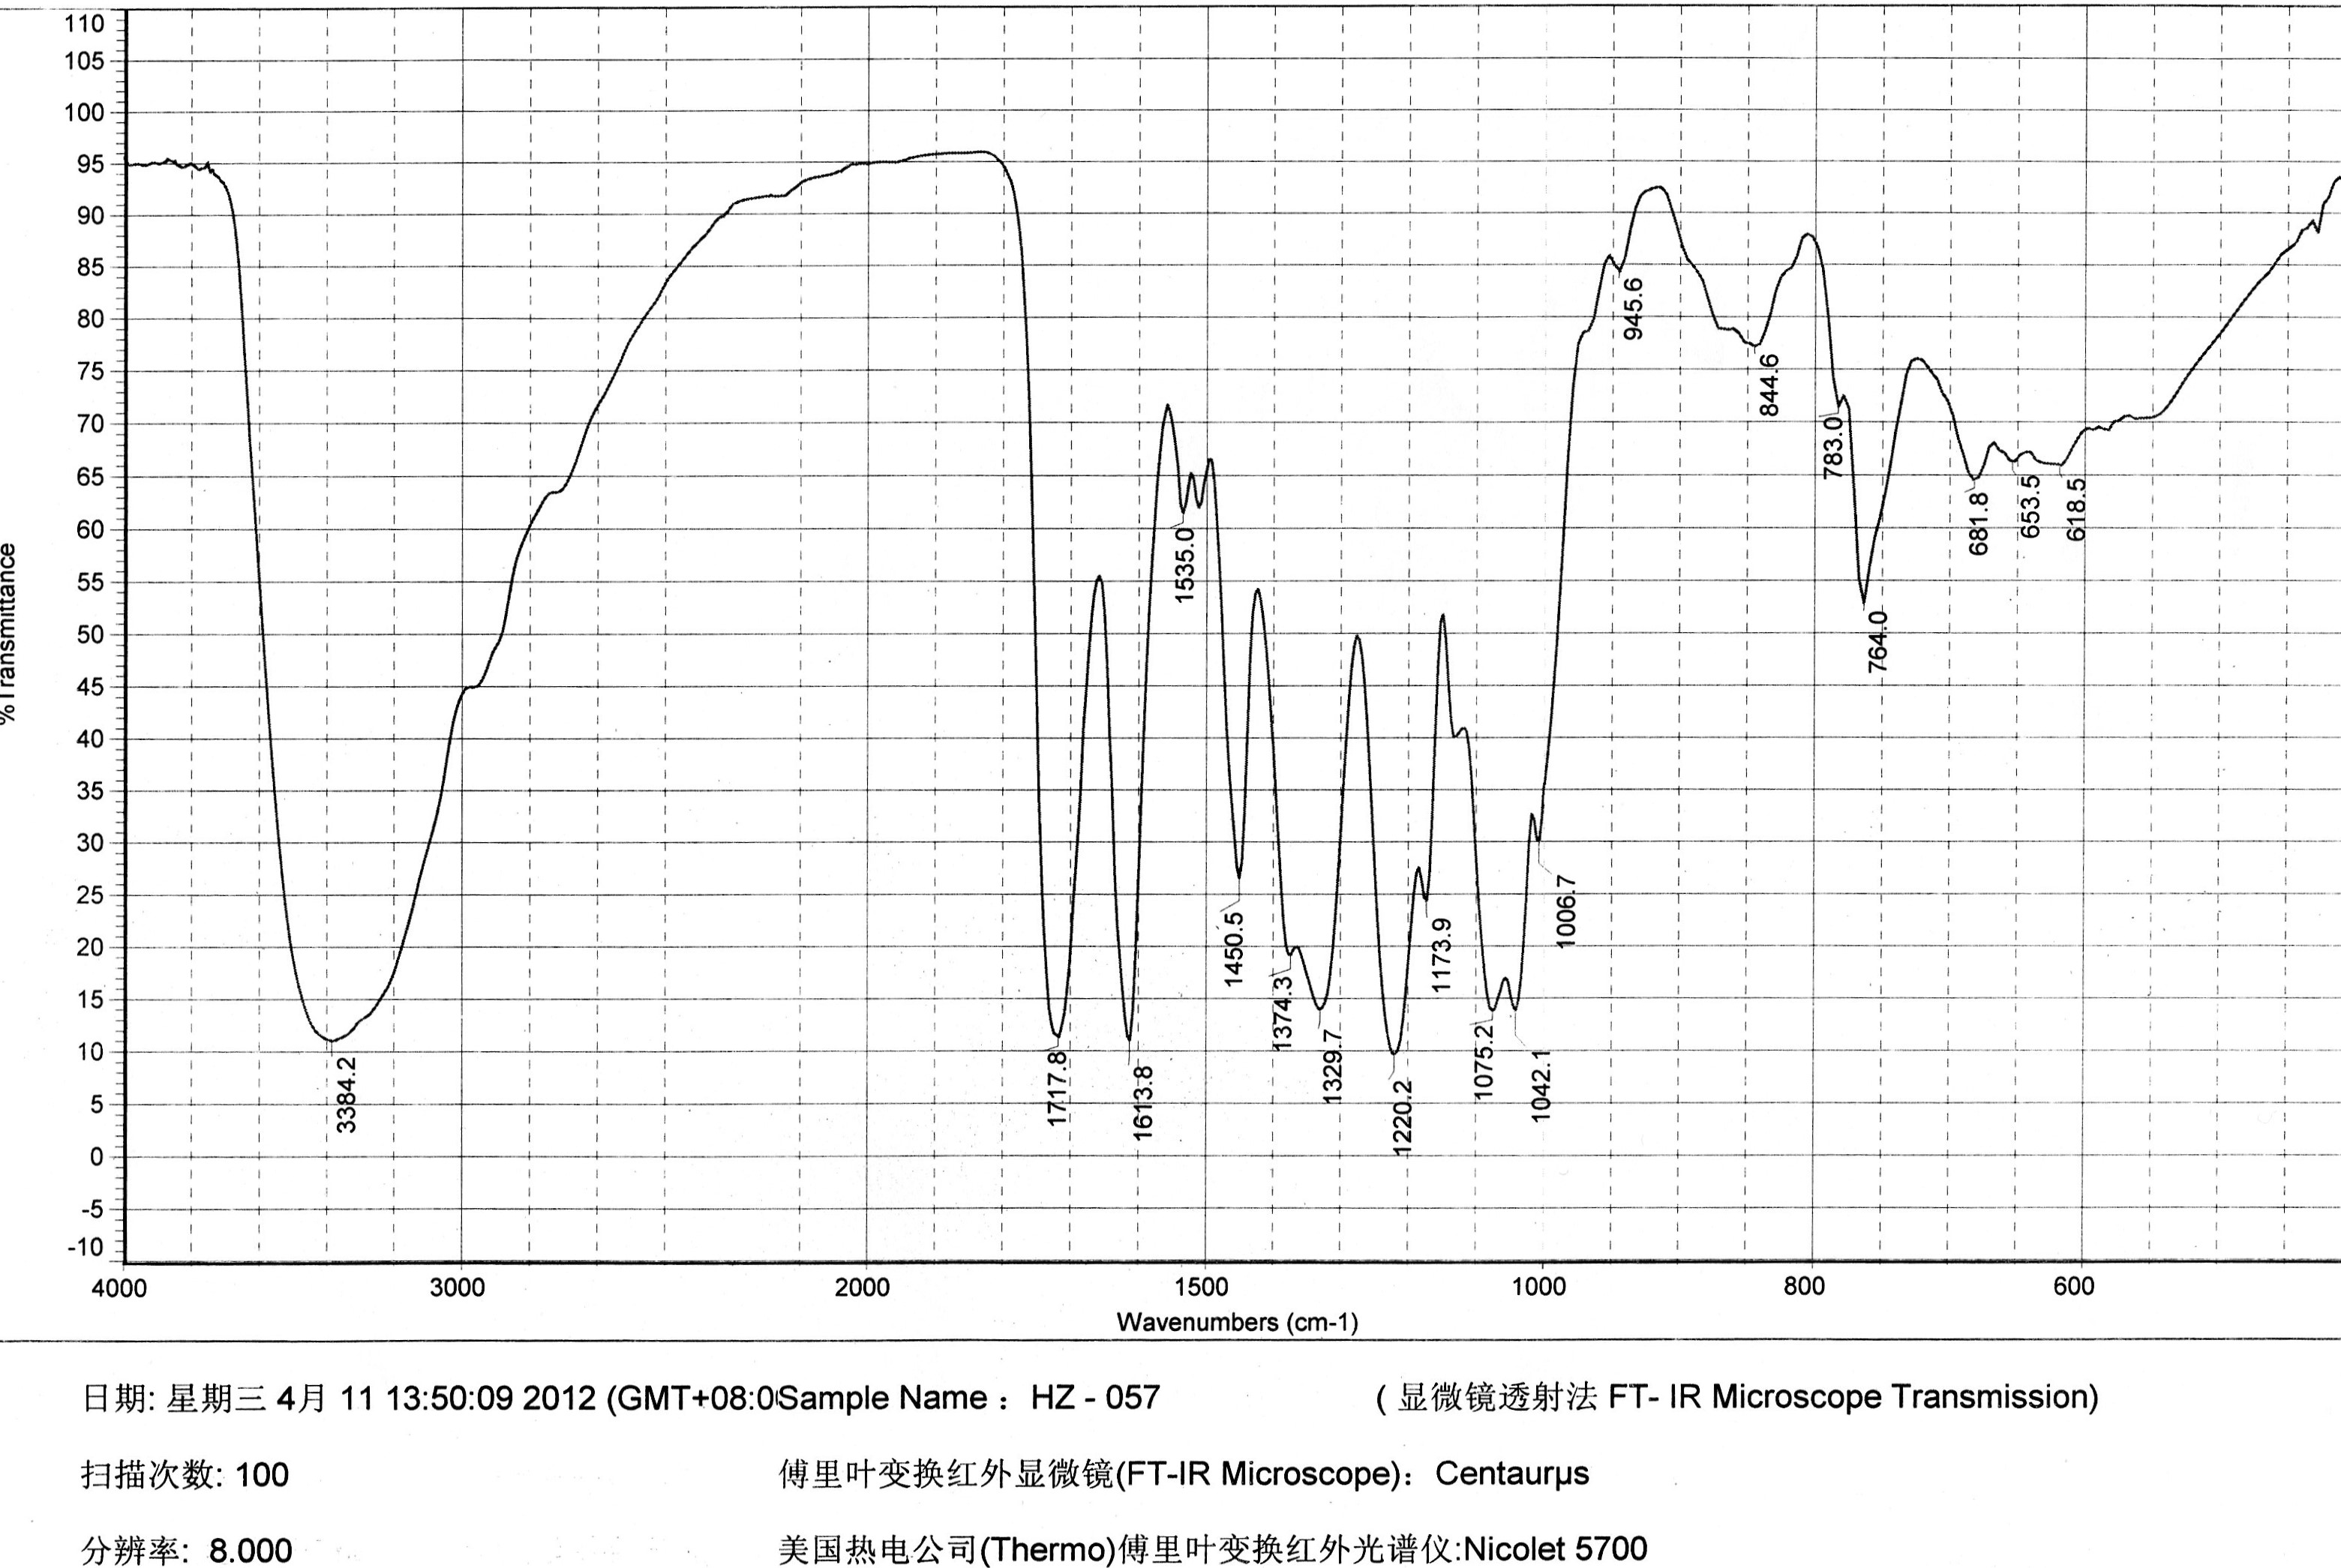
**

**Figure S1.** IR spectrum of polyphthaliside A (**1**)


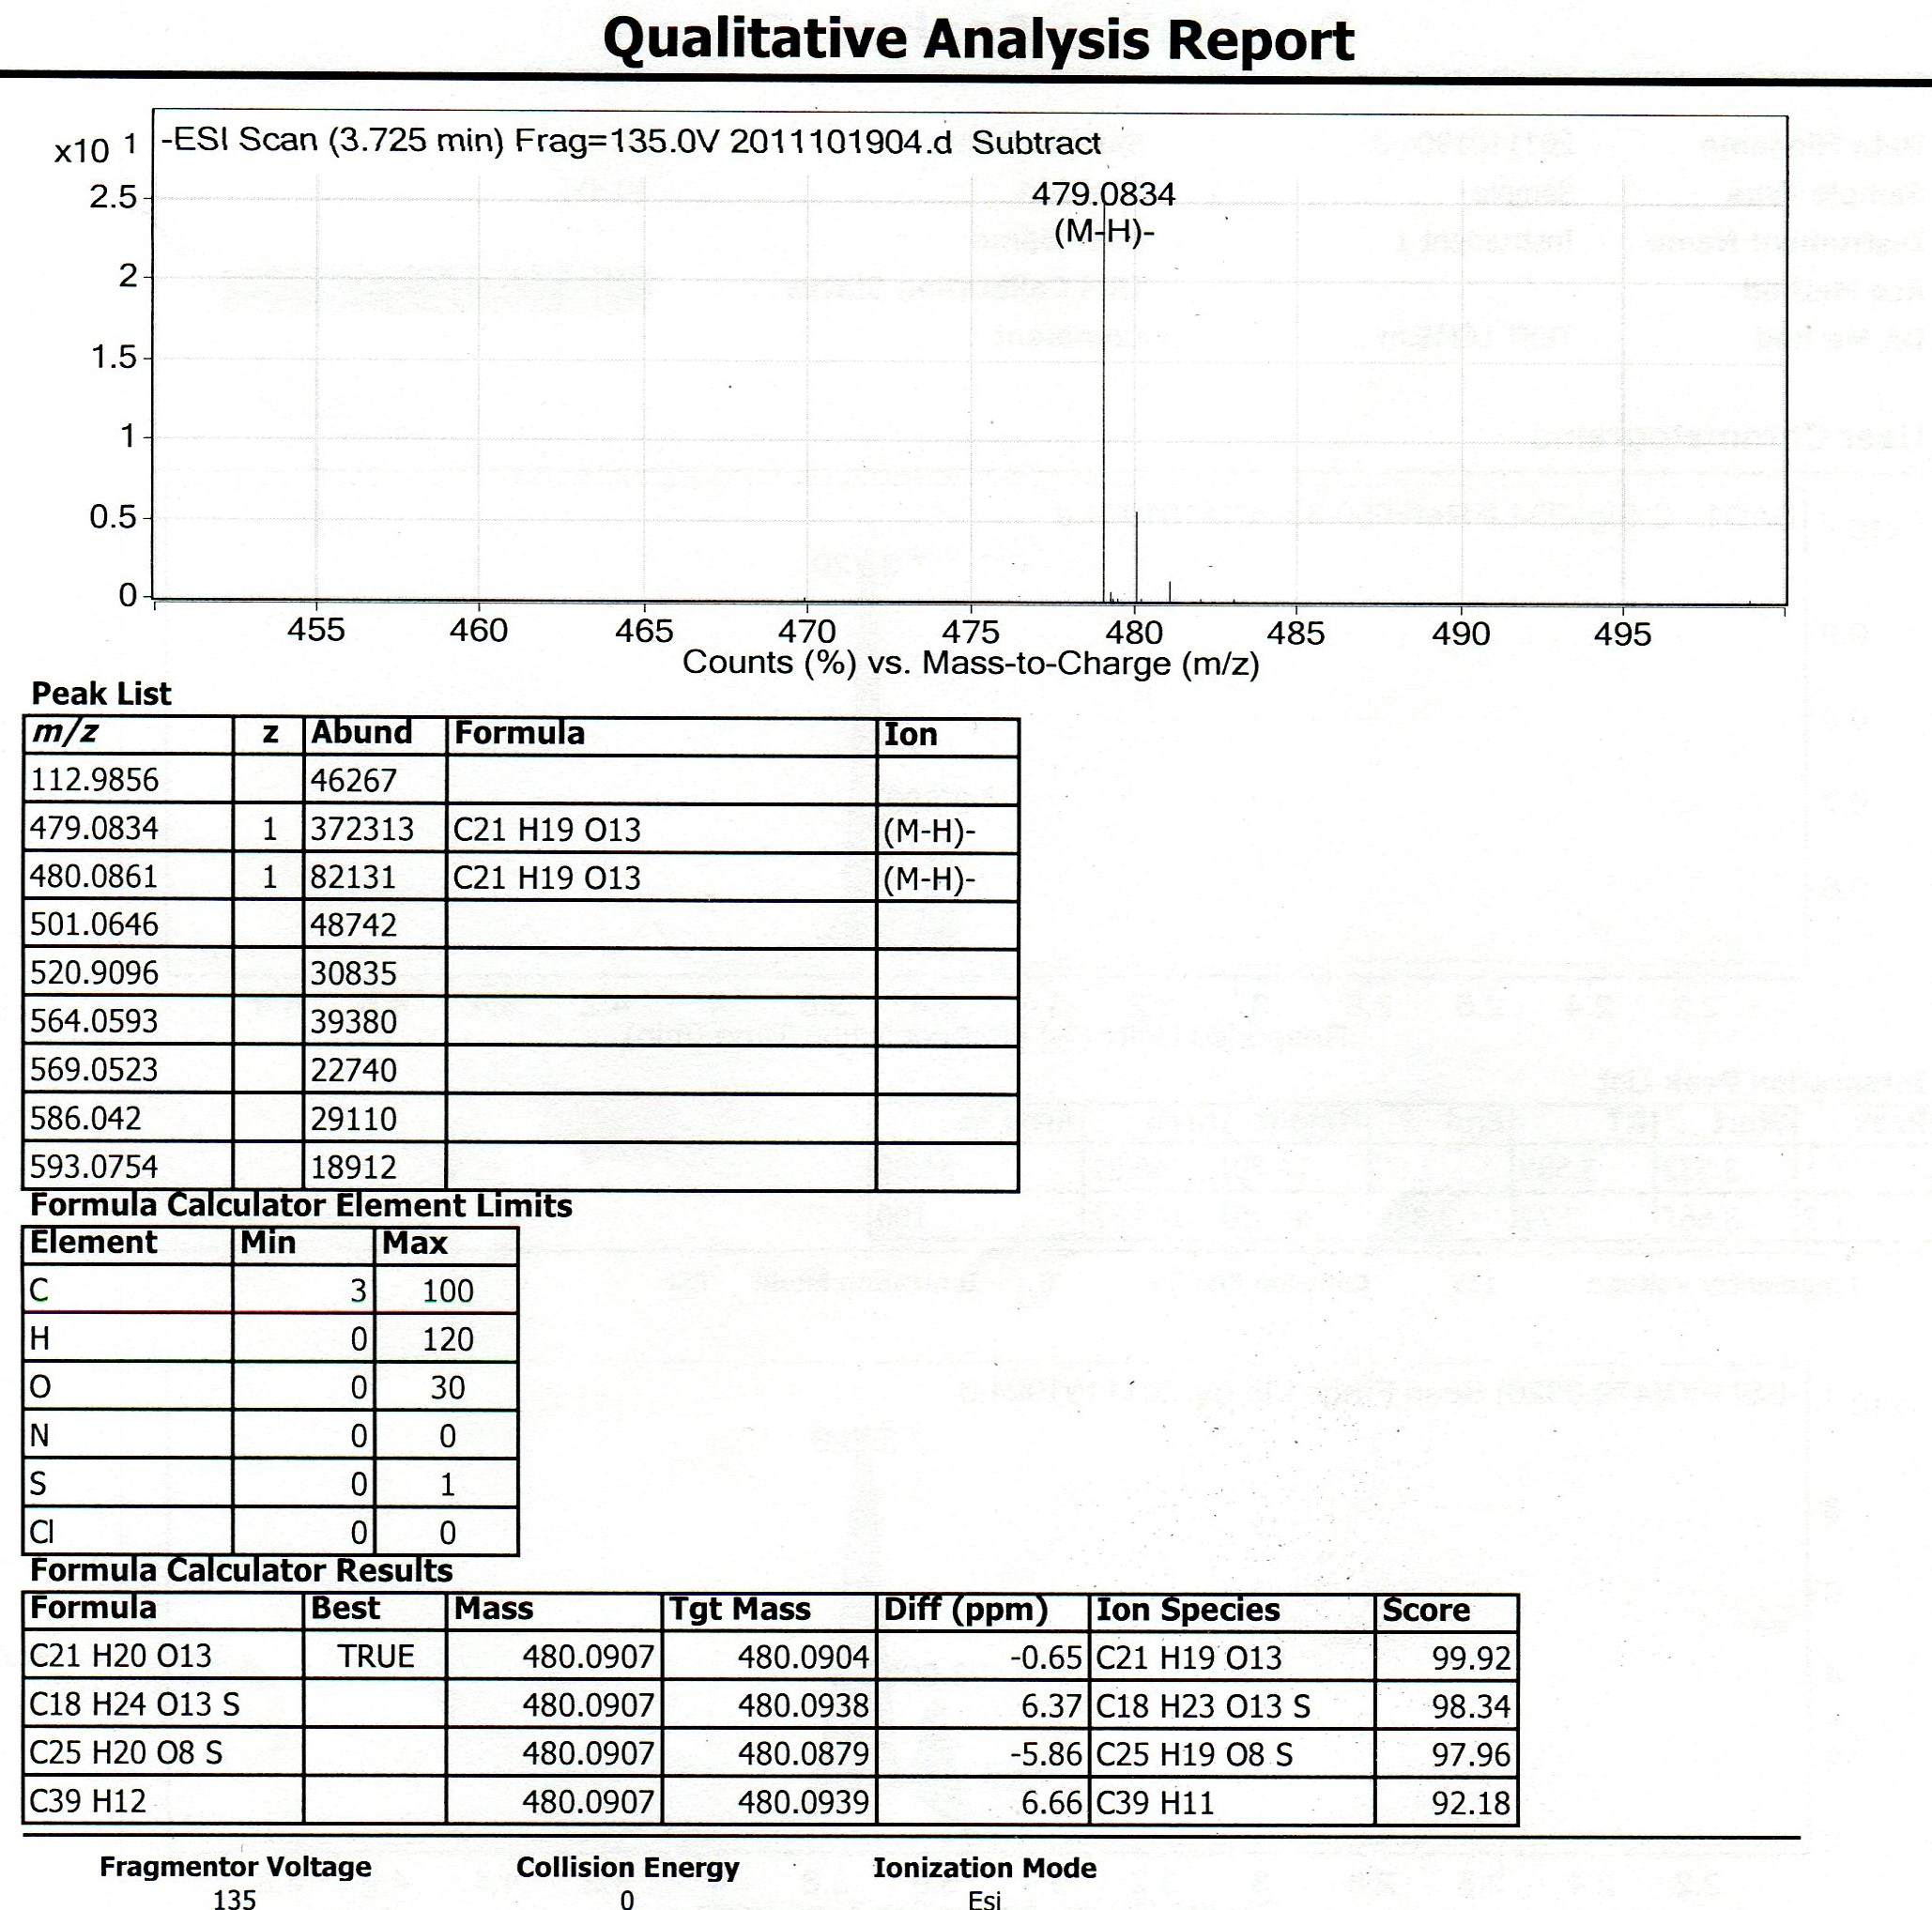


**Figure S2.** HR-ESI-MS spectrum of polyphthaliside A (**1**)


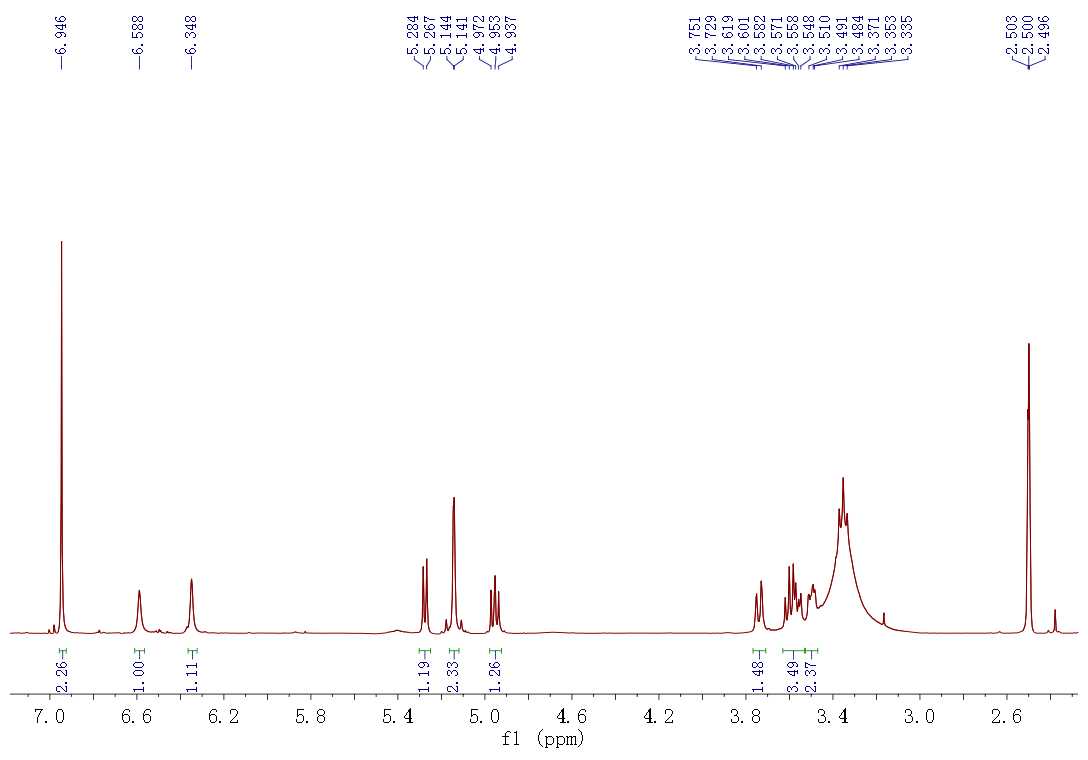


**Figure S3.** 1H NMR spectrum of polyphthaliside A (**1**) in DMSO-*d6*

**
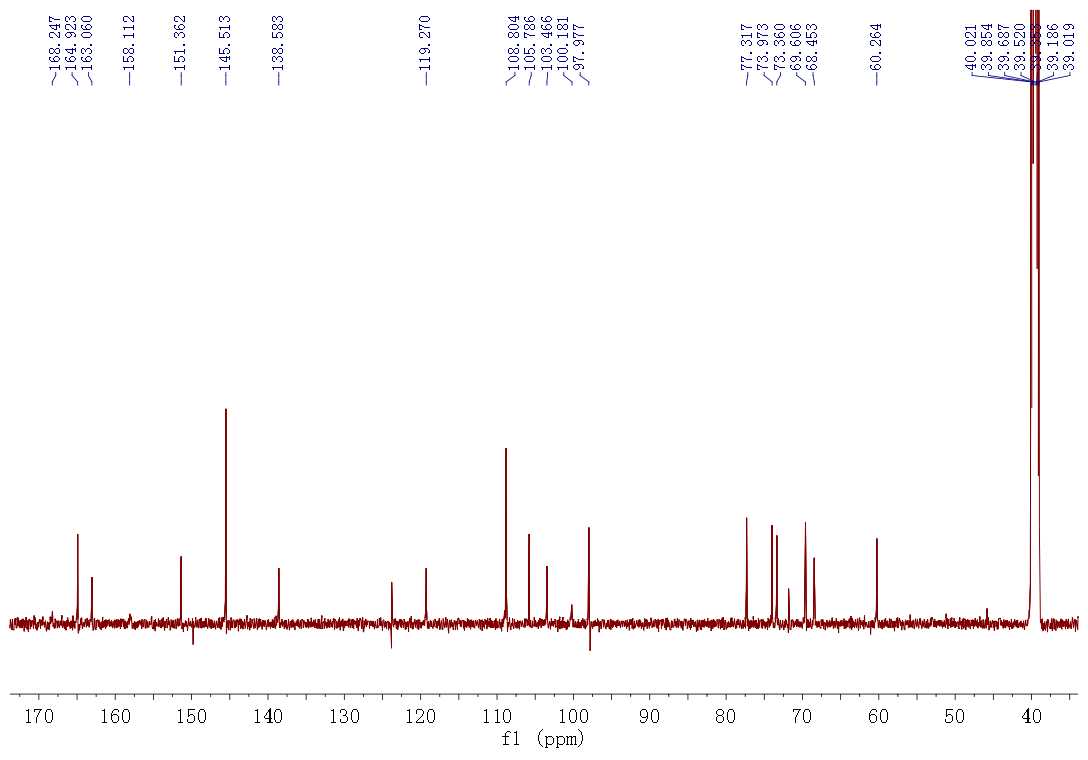
**

**Figure S4.** 13C NMR spectrum of polyphthaliside A (**1**) in DMSO-*d6*

**
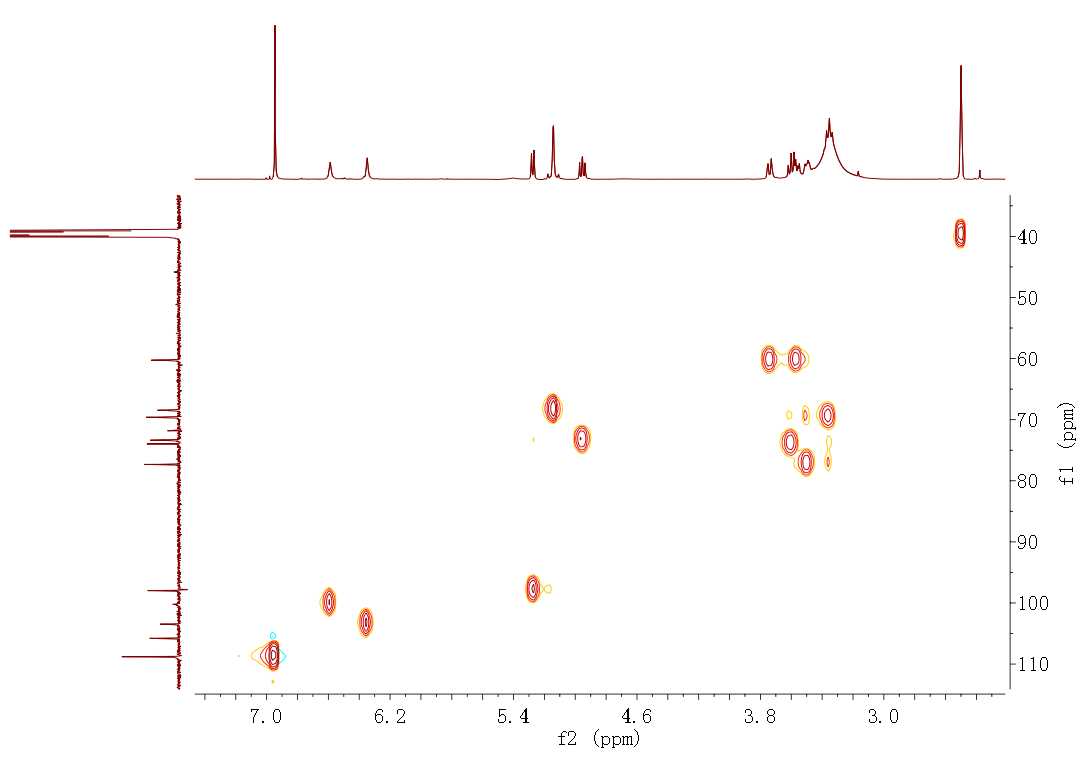
**

**Figure S5.** HSQC NMR spectrum of polyphthaliside A (**1**) in DMSO-*d6*


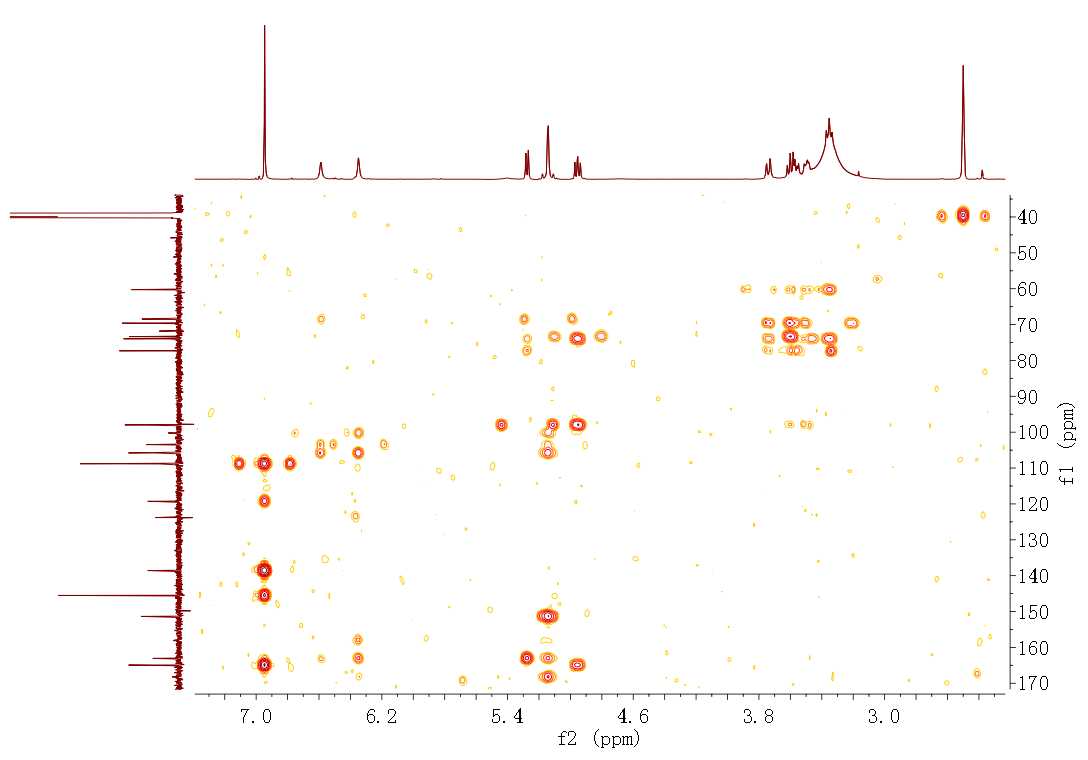


**Figure S6.** HMBC NMR spectrum of polyphthaliside A (**1**) in DMSO-*d6*


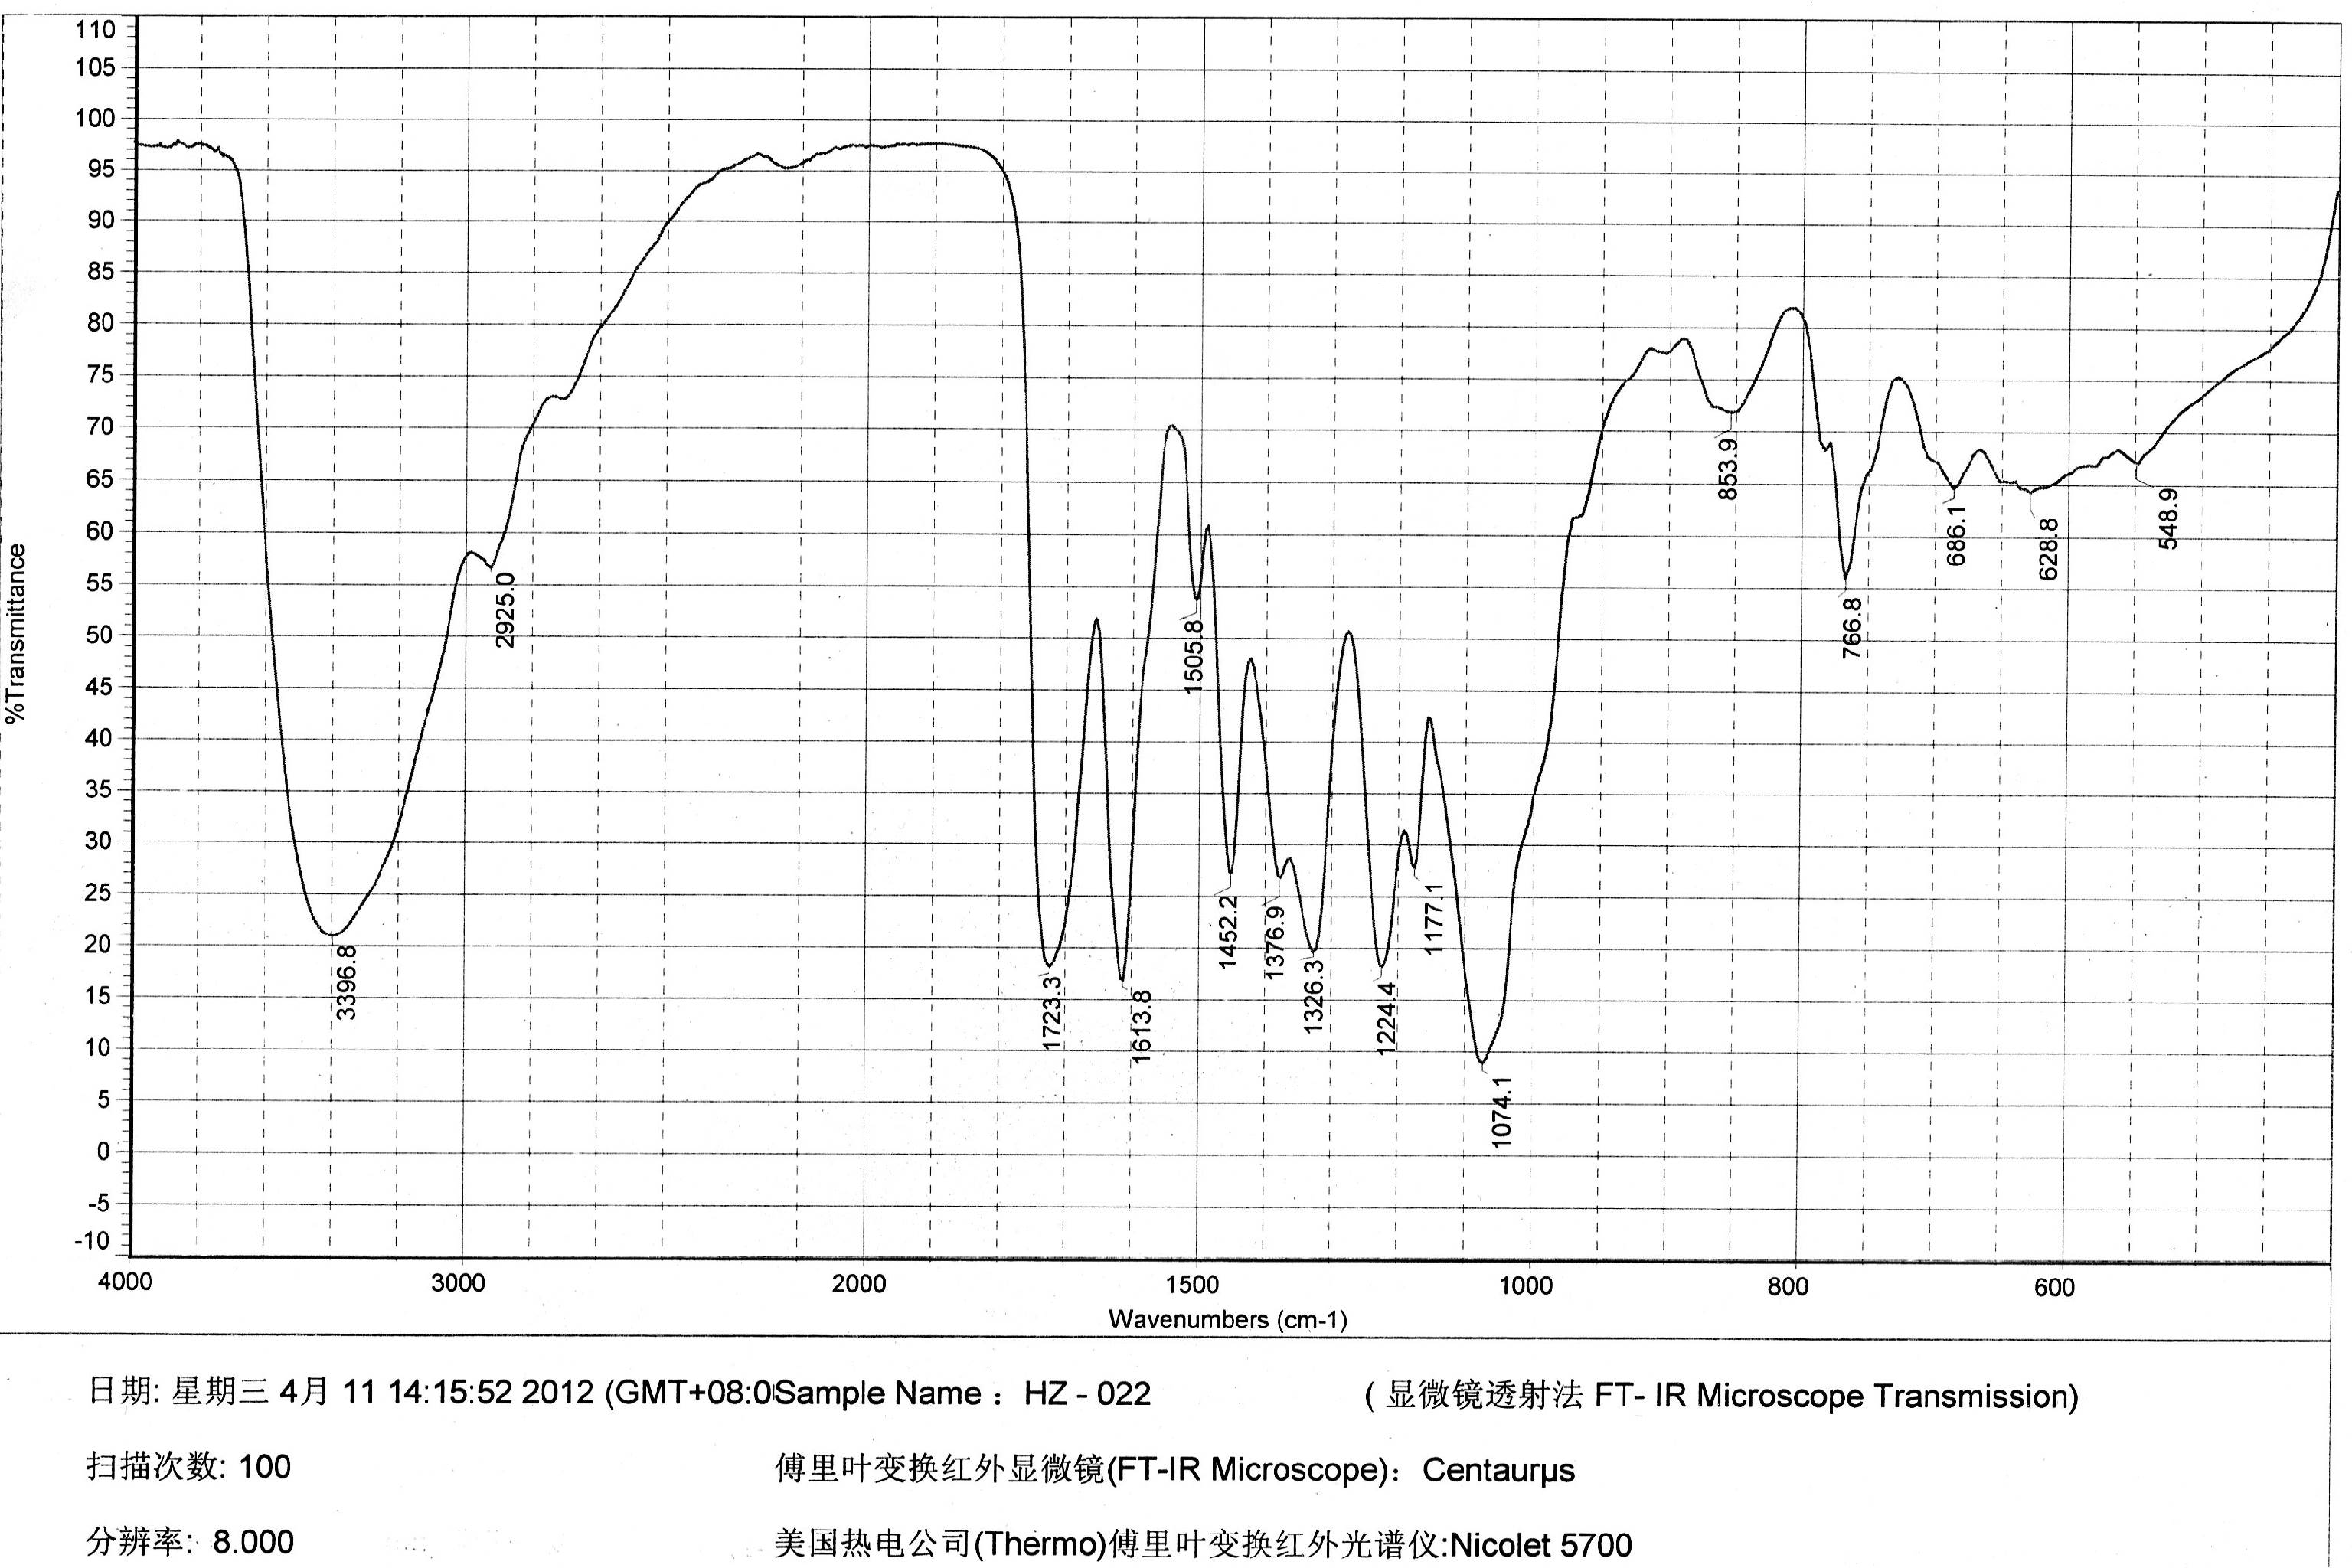


**Figure S7.** IR spectrum of polyphthaliside B (**2**)


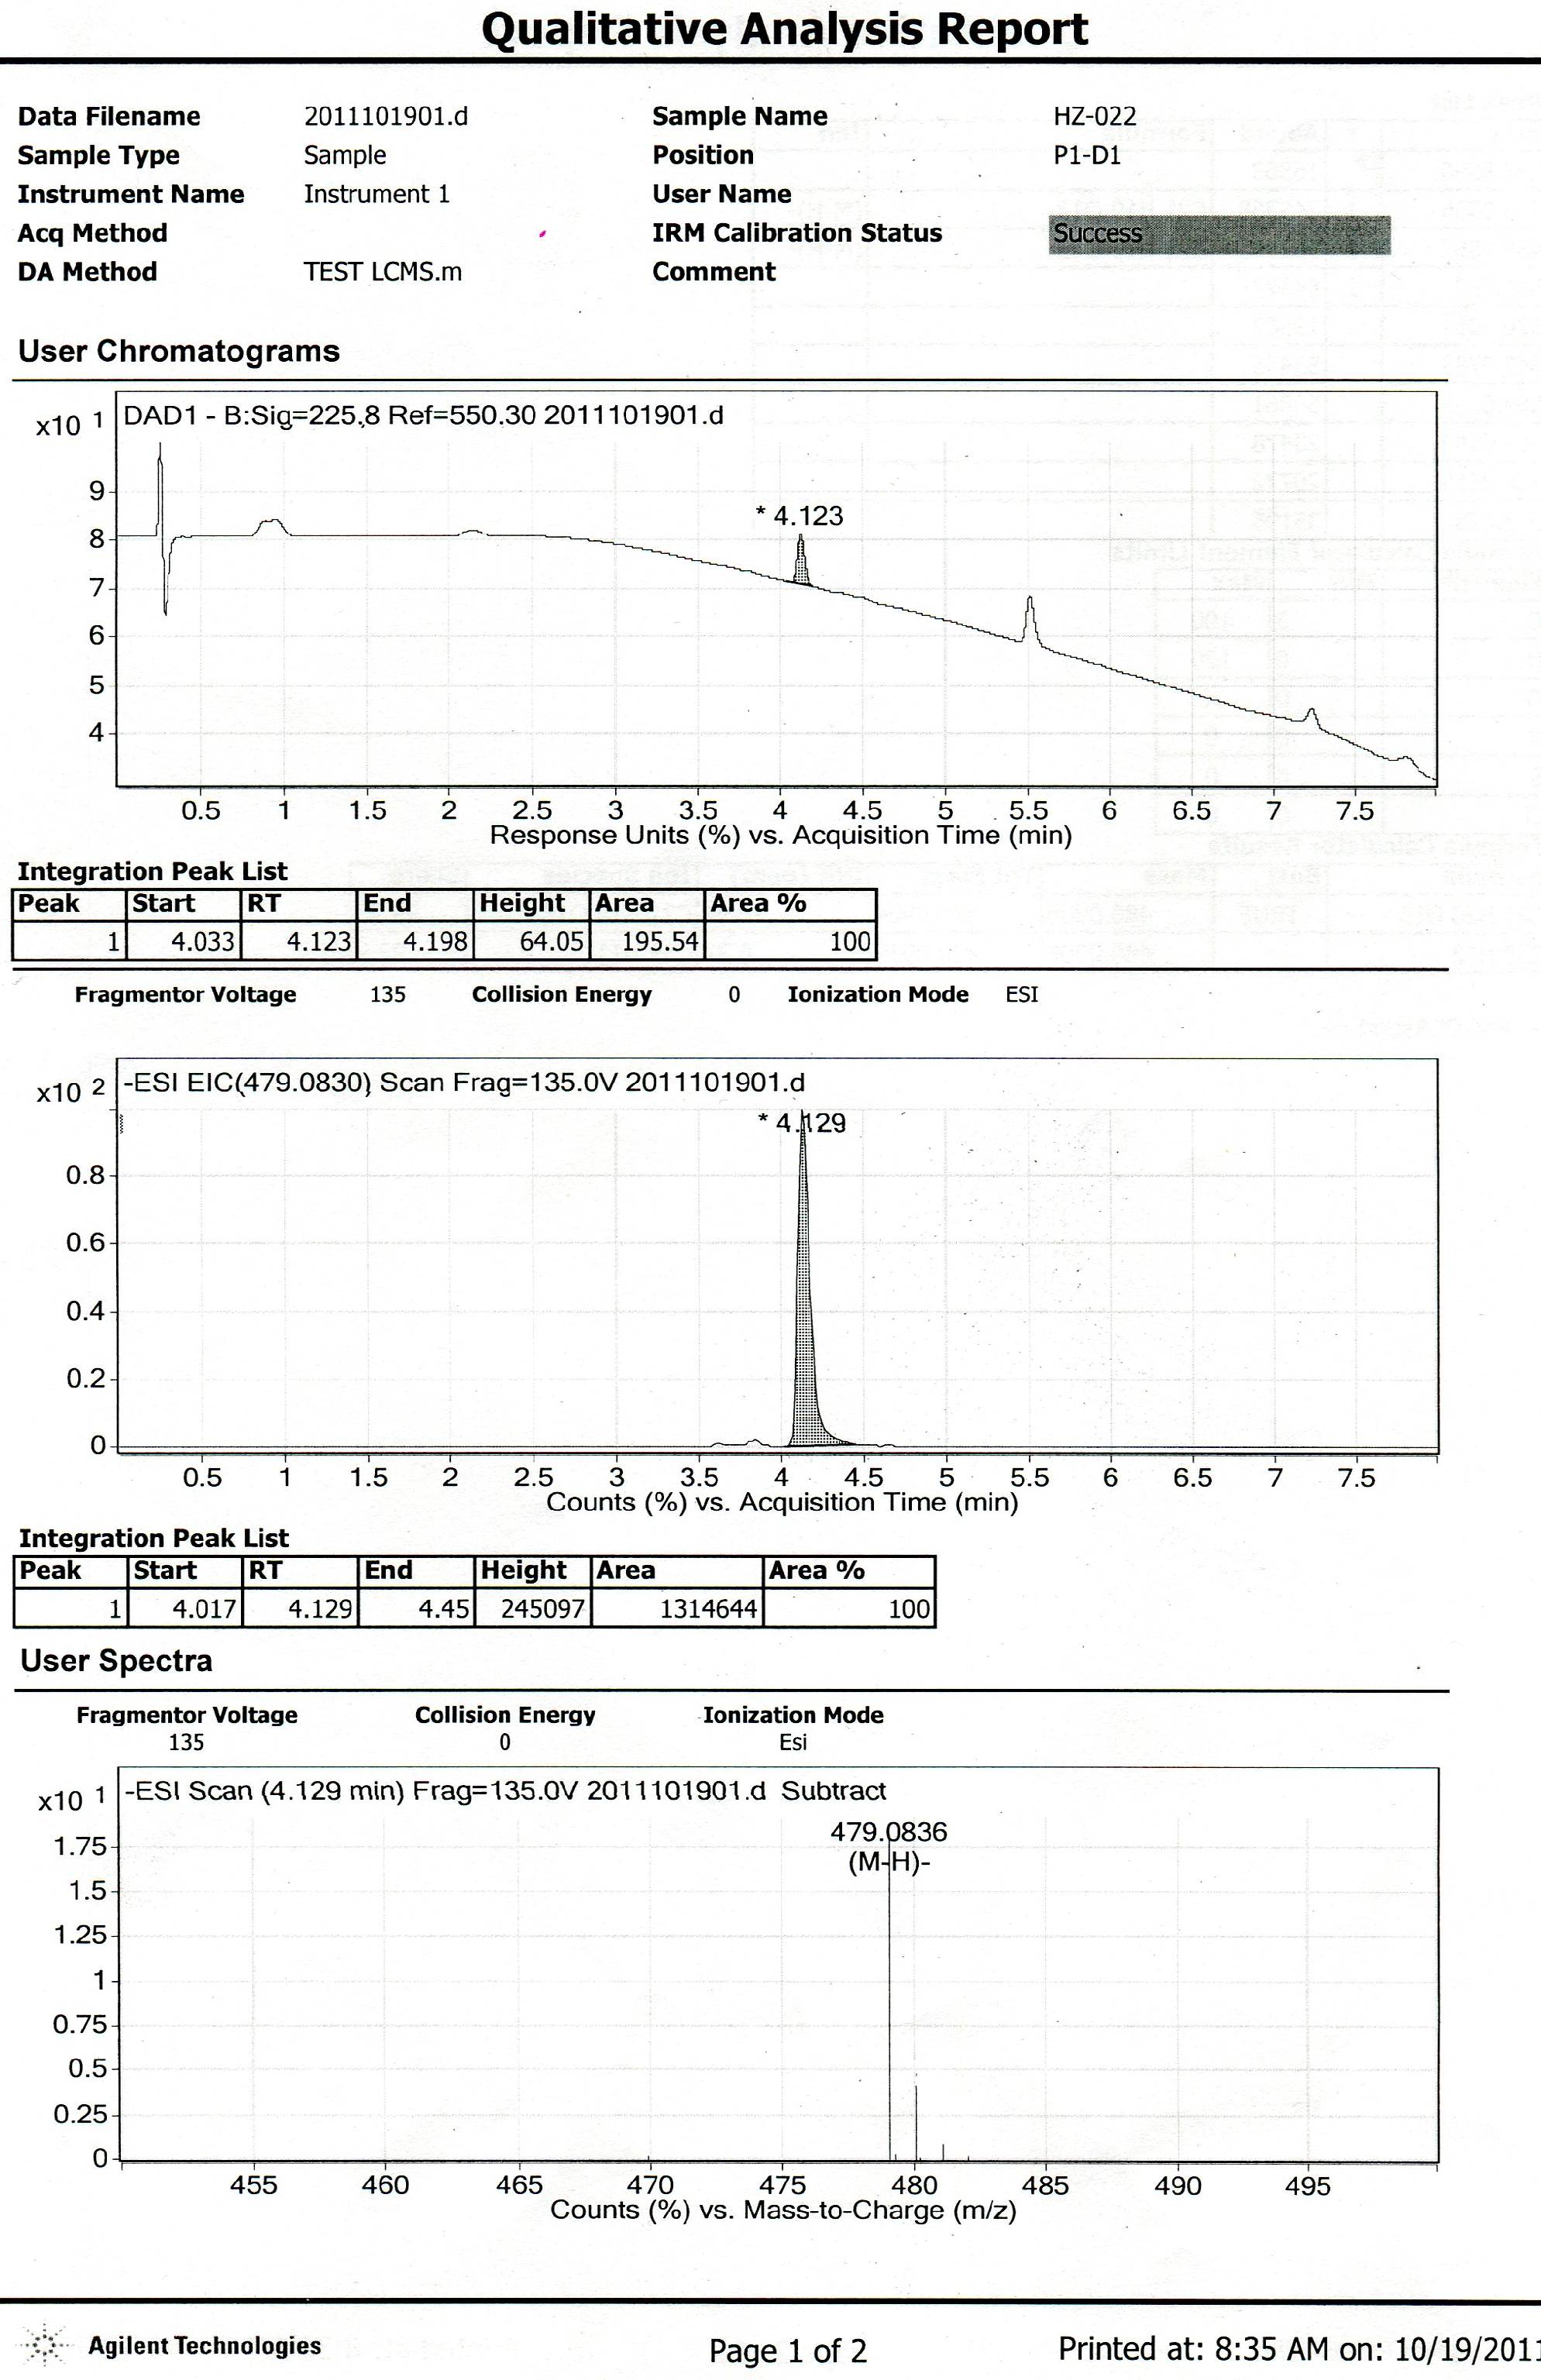


**Figure S8.** HR-ESI-MS spectrum of polyphthaliside B (**2**)


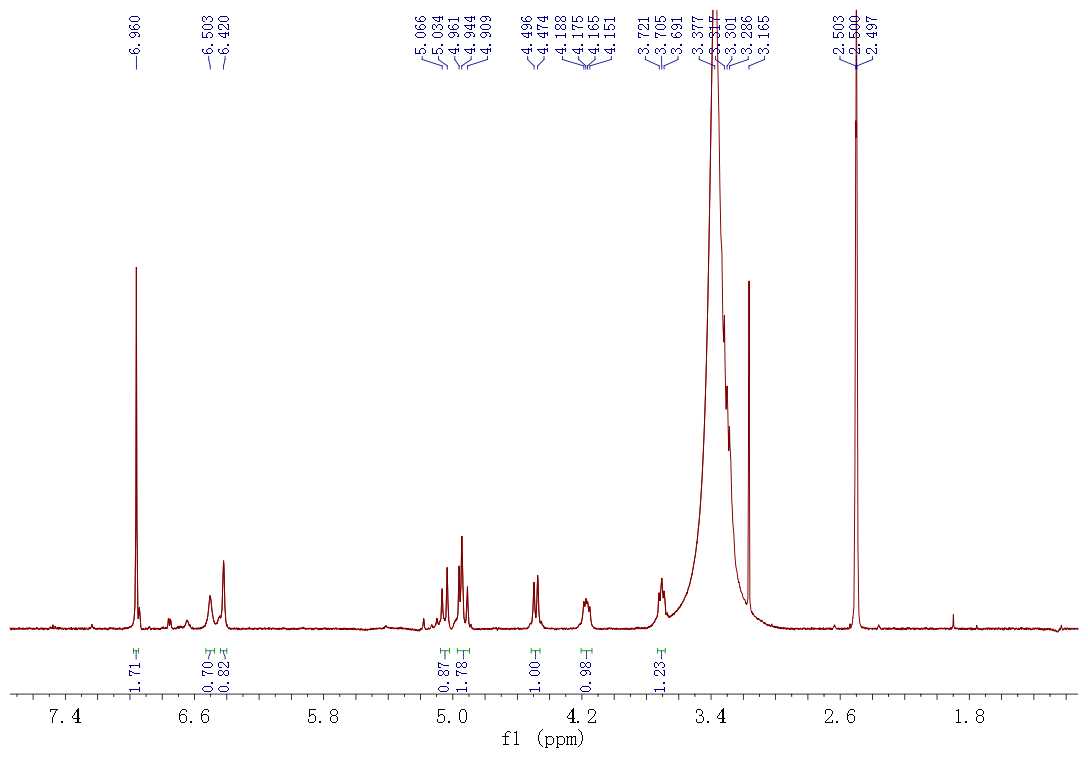


**Figure S9.** 1H NMR spectrum of polyphthaliside B (**2**) in DMSO-*d6*


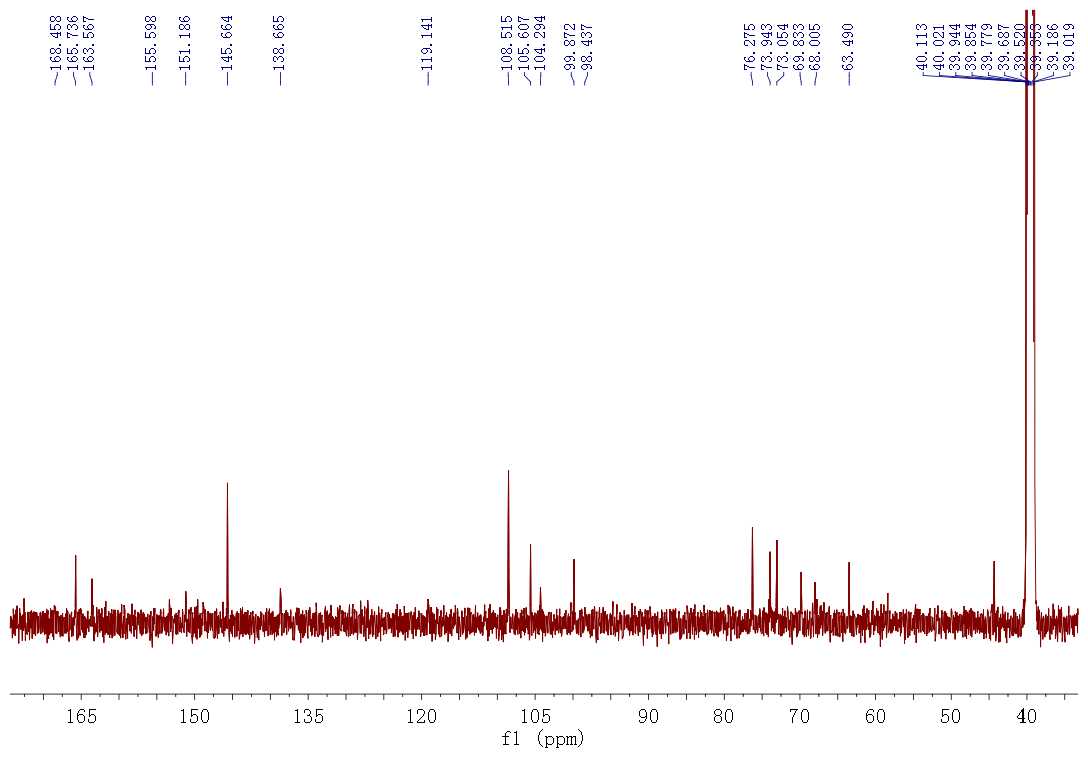


**Figure S10.** 13C NMR spectrum of polyphthaliside B (**2**) in DMSO-*d6*


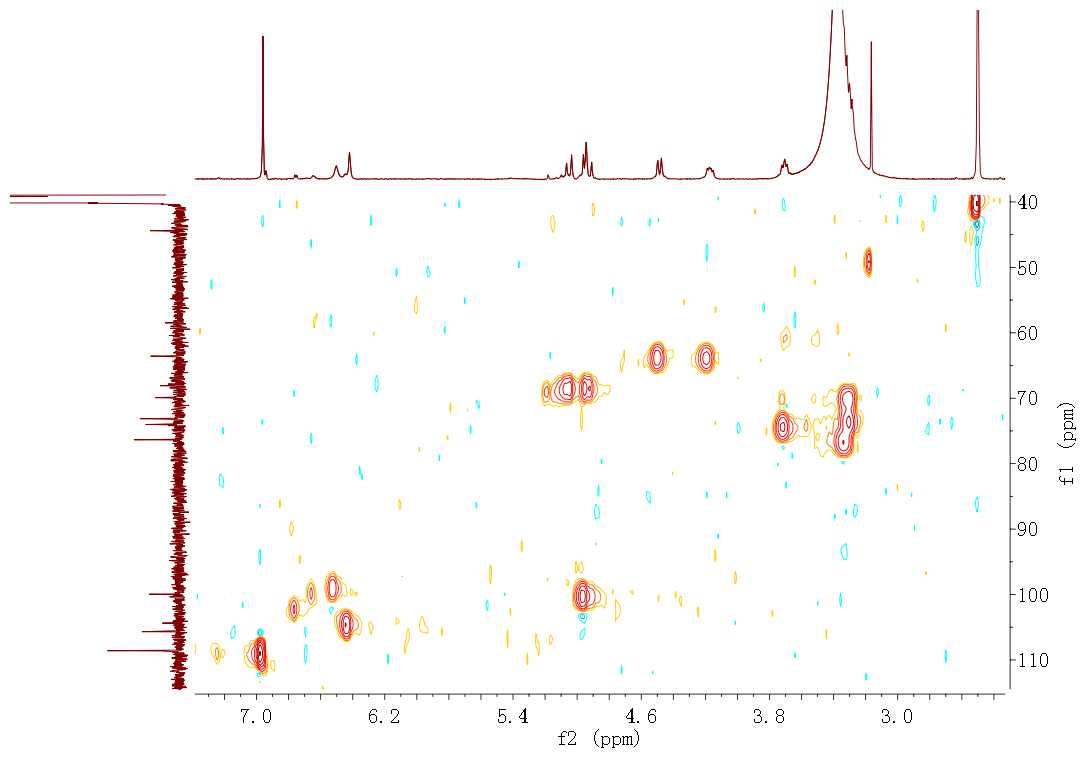


**Figure S11.** HSQC NMR spectrum of polyphthaliside B (**2**) in DMSO-*d6*


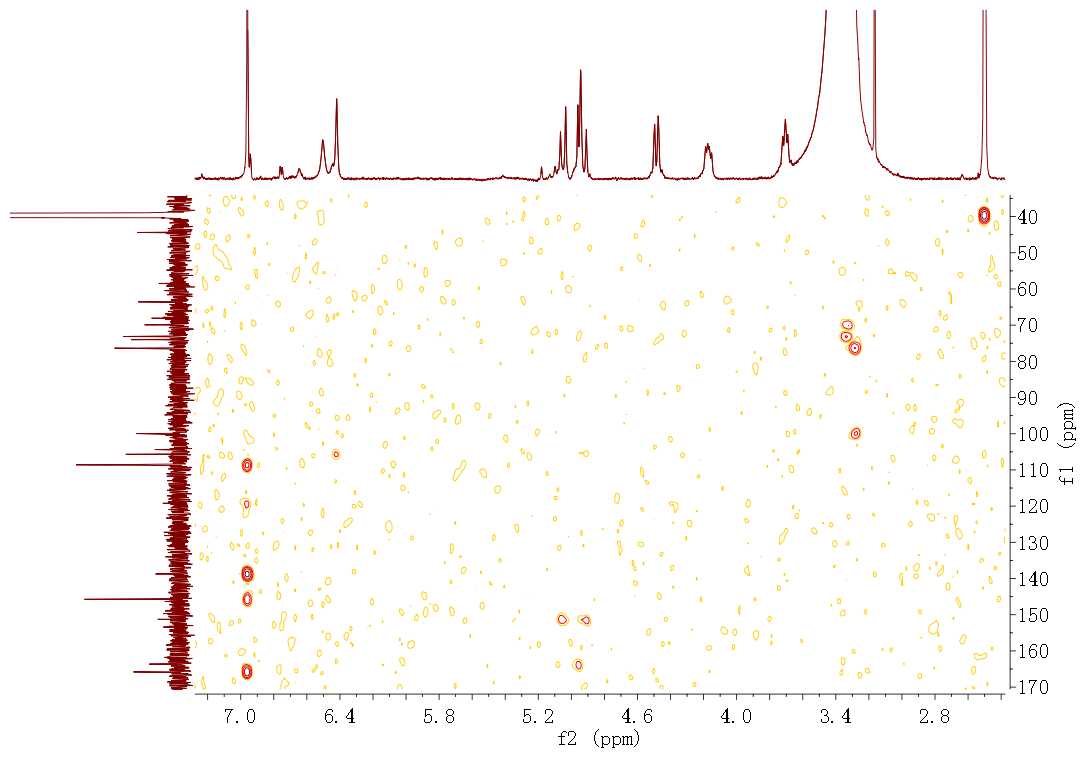


**Figure S12.** HMBC NMR spectrum of polyphthaliside B (**2**) in DMSO-*d6*


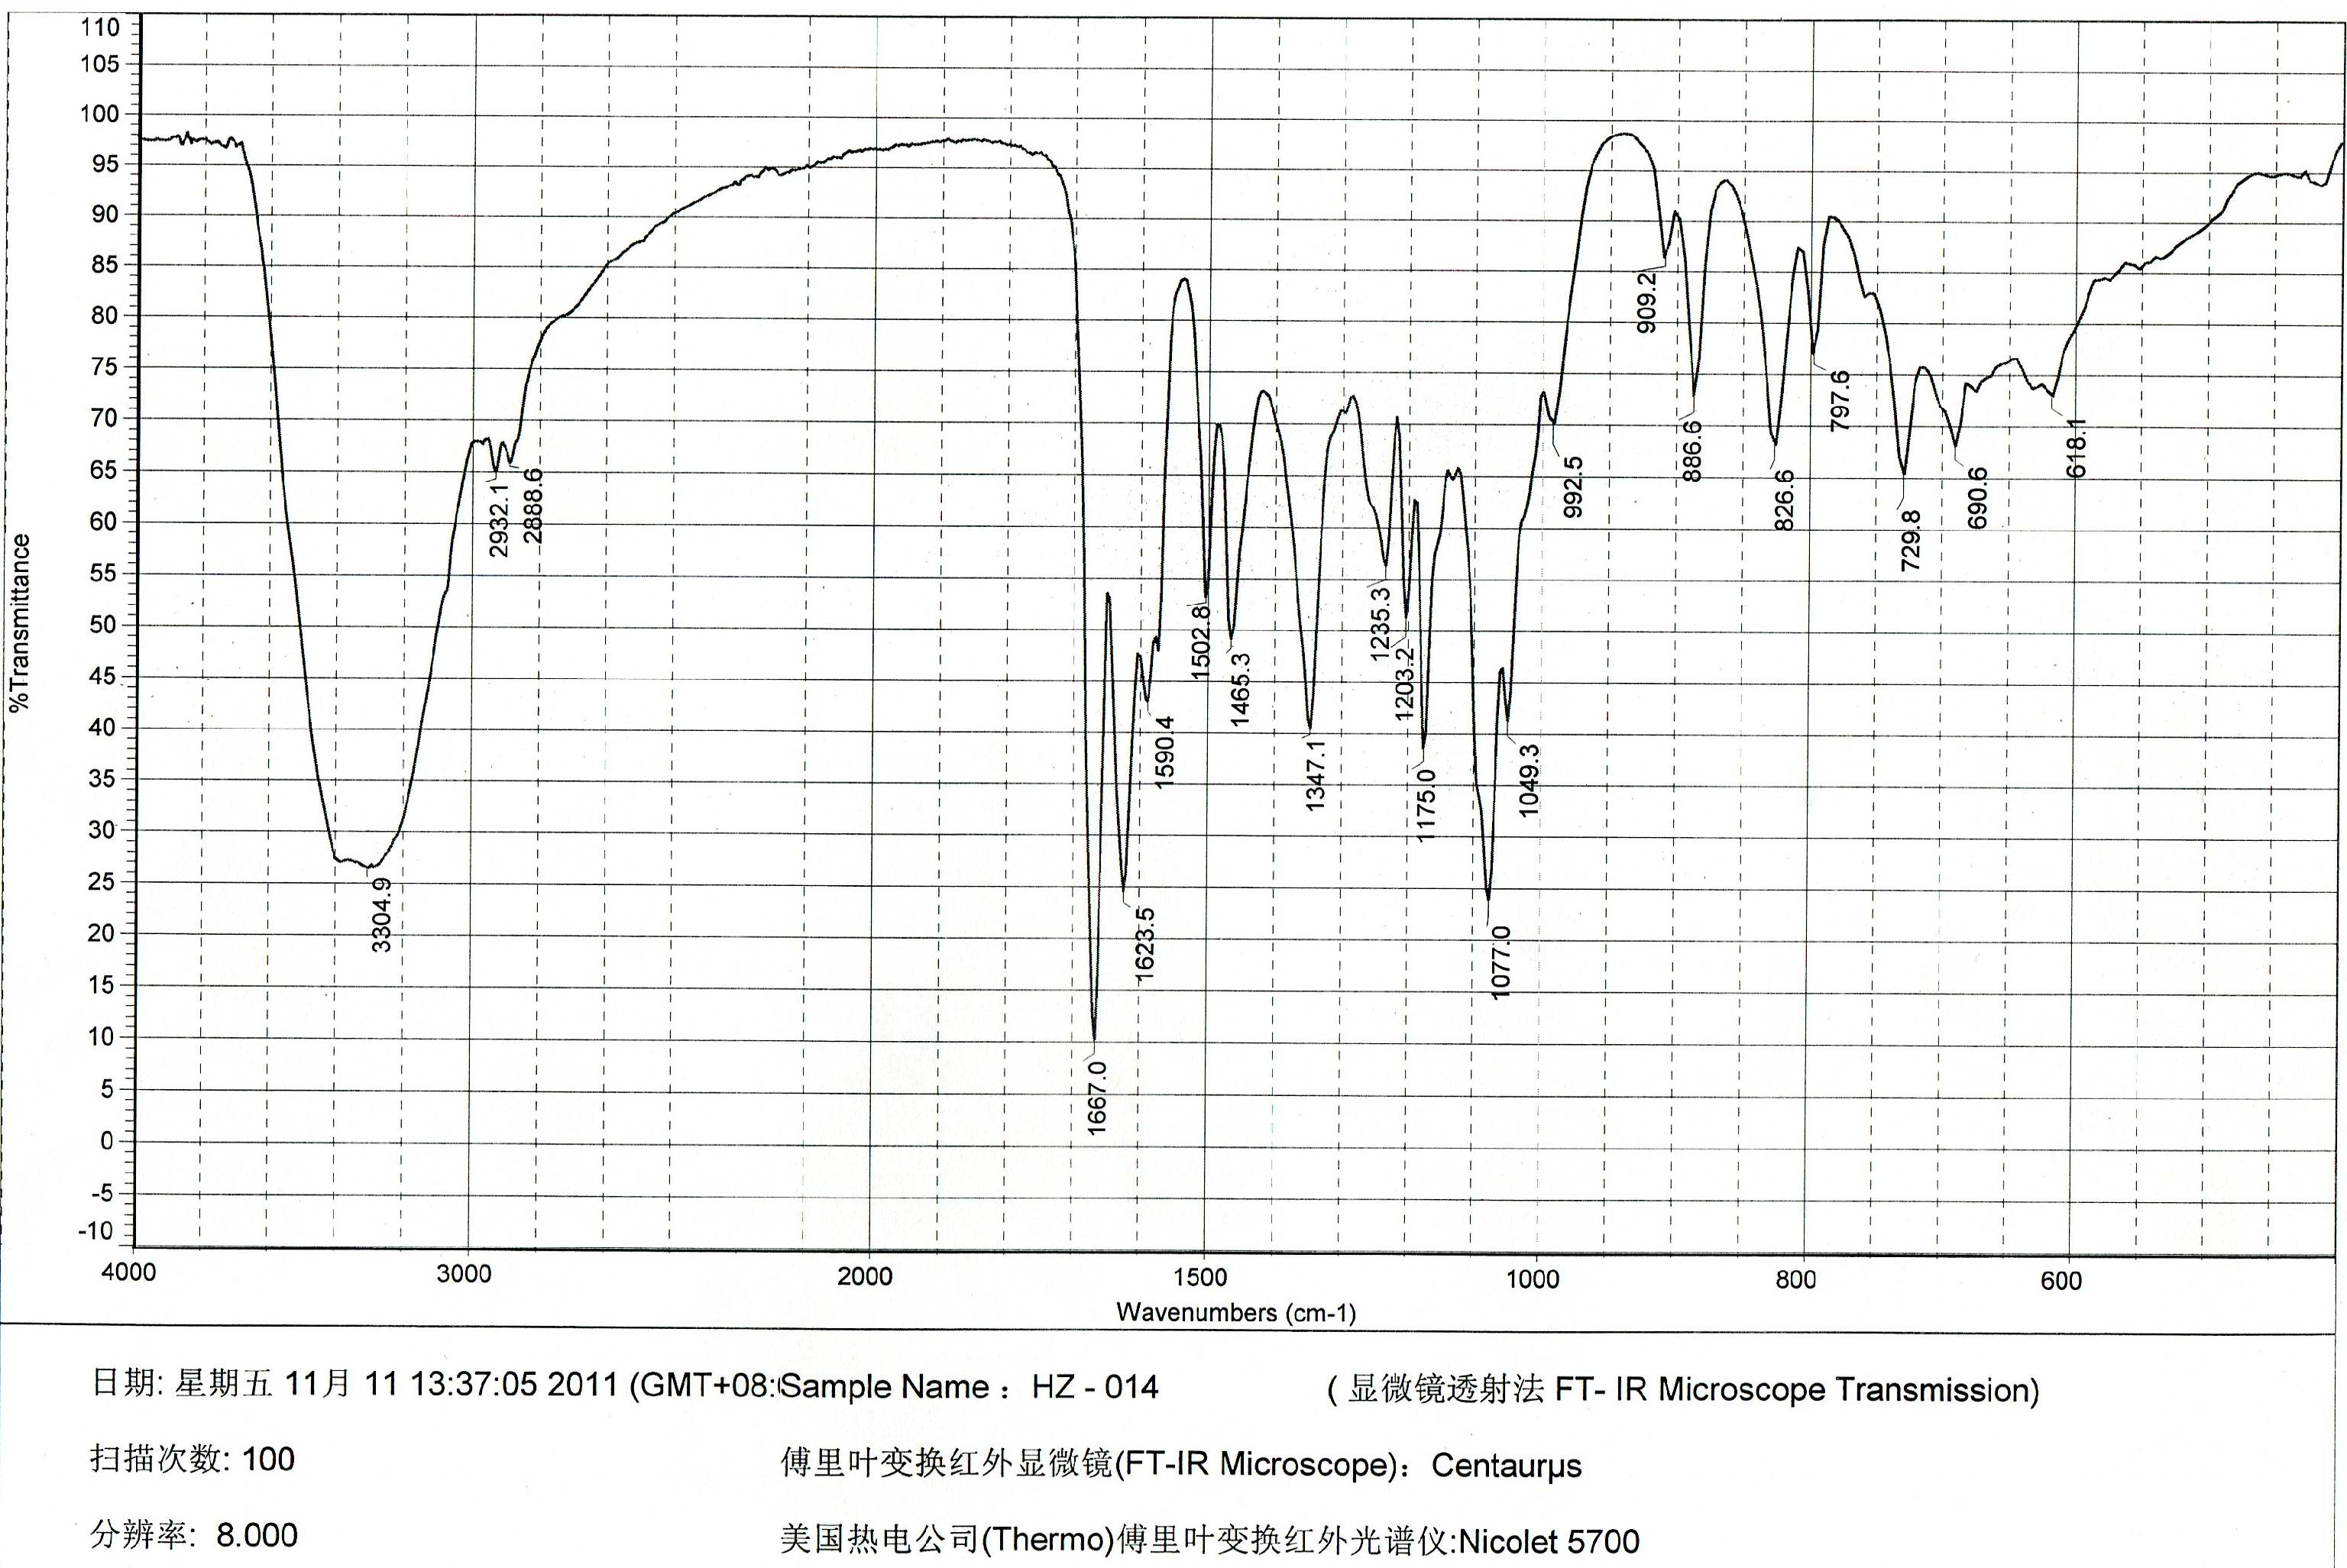


**Figure S13.** IR spectrum of polyisocoumarin (**3**) in


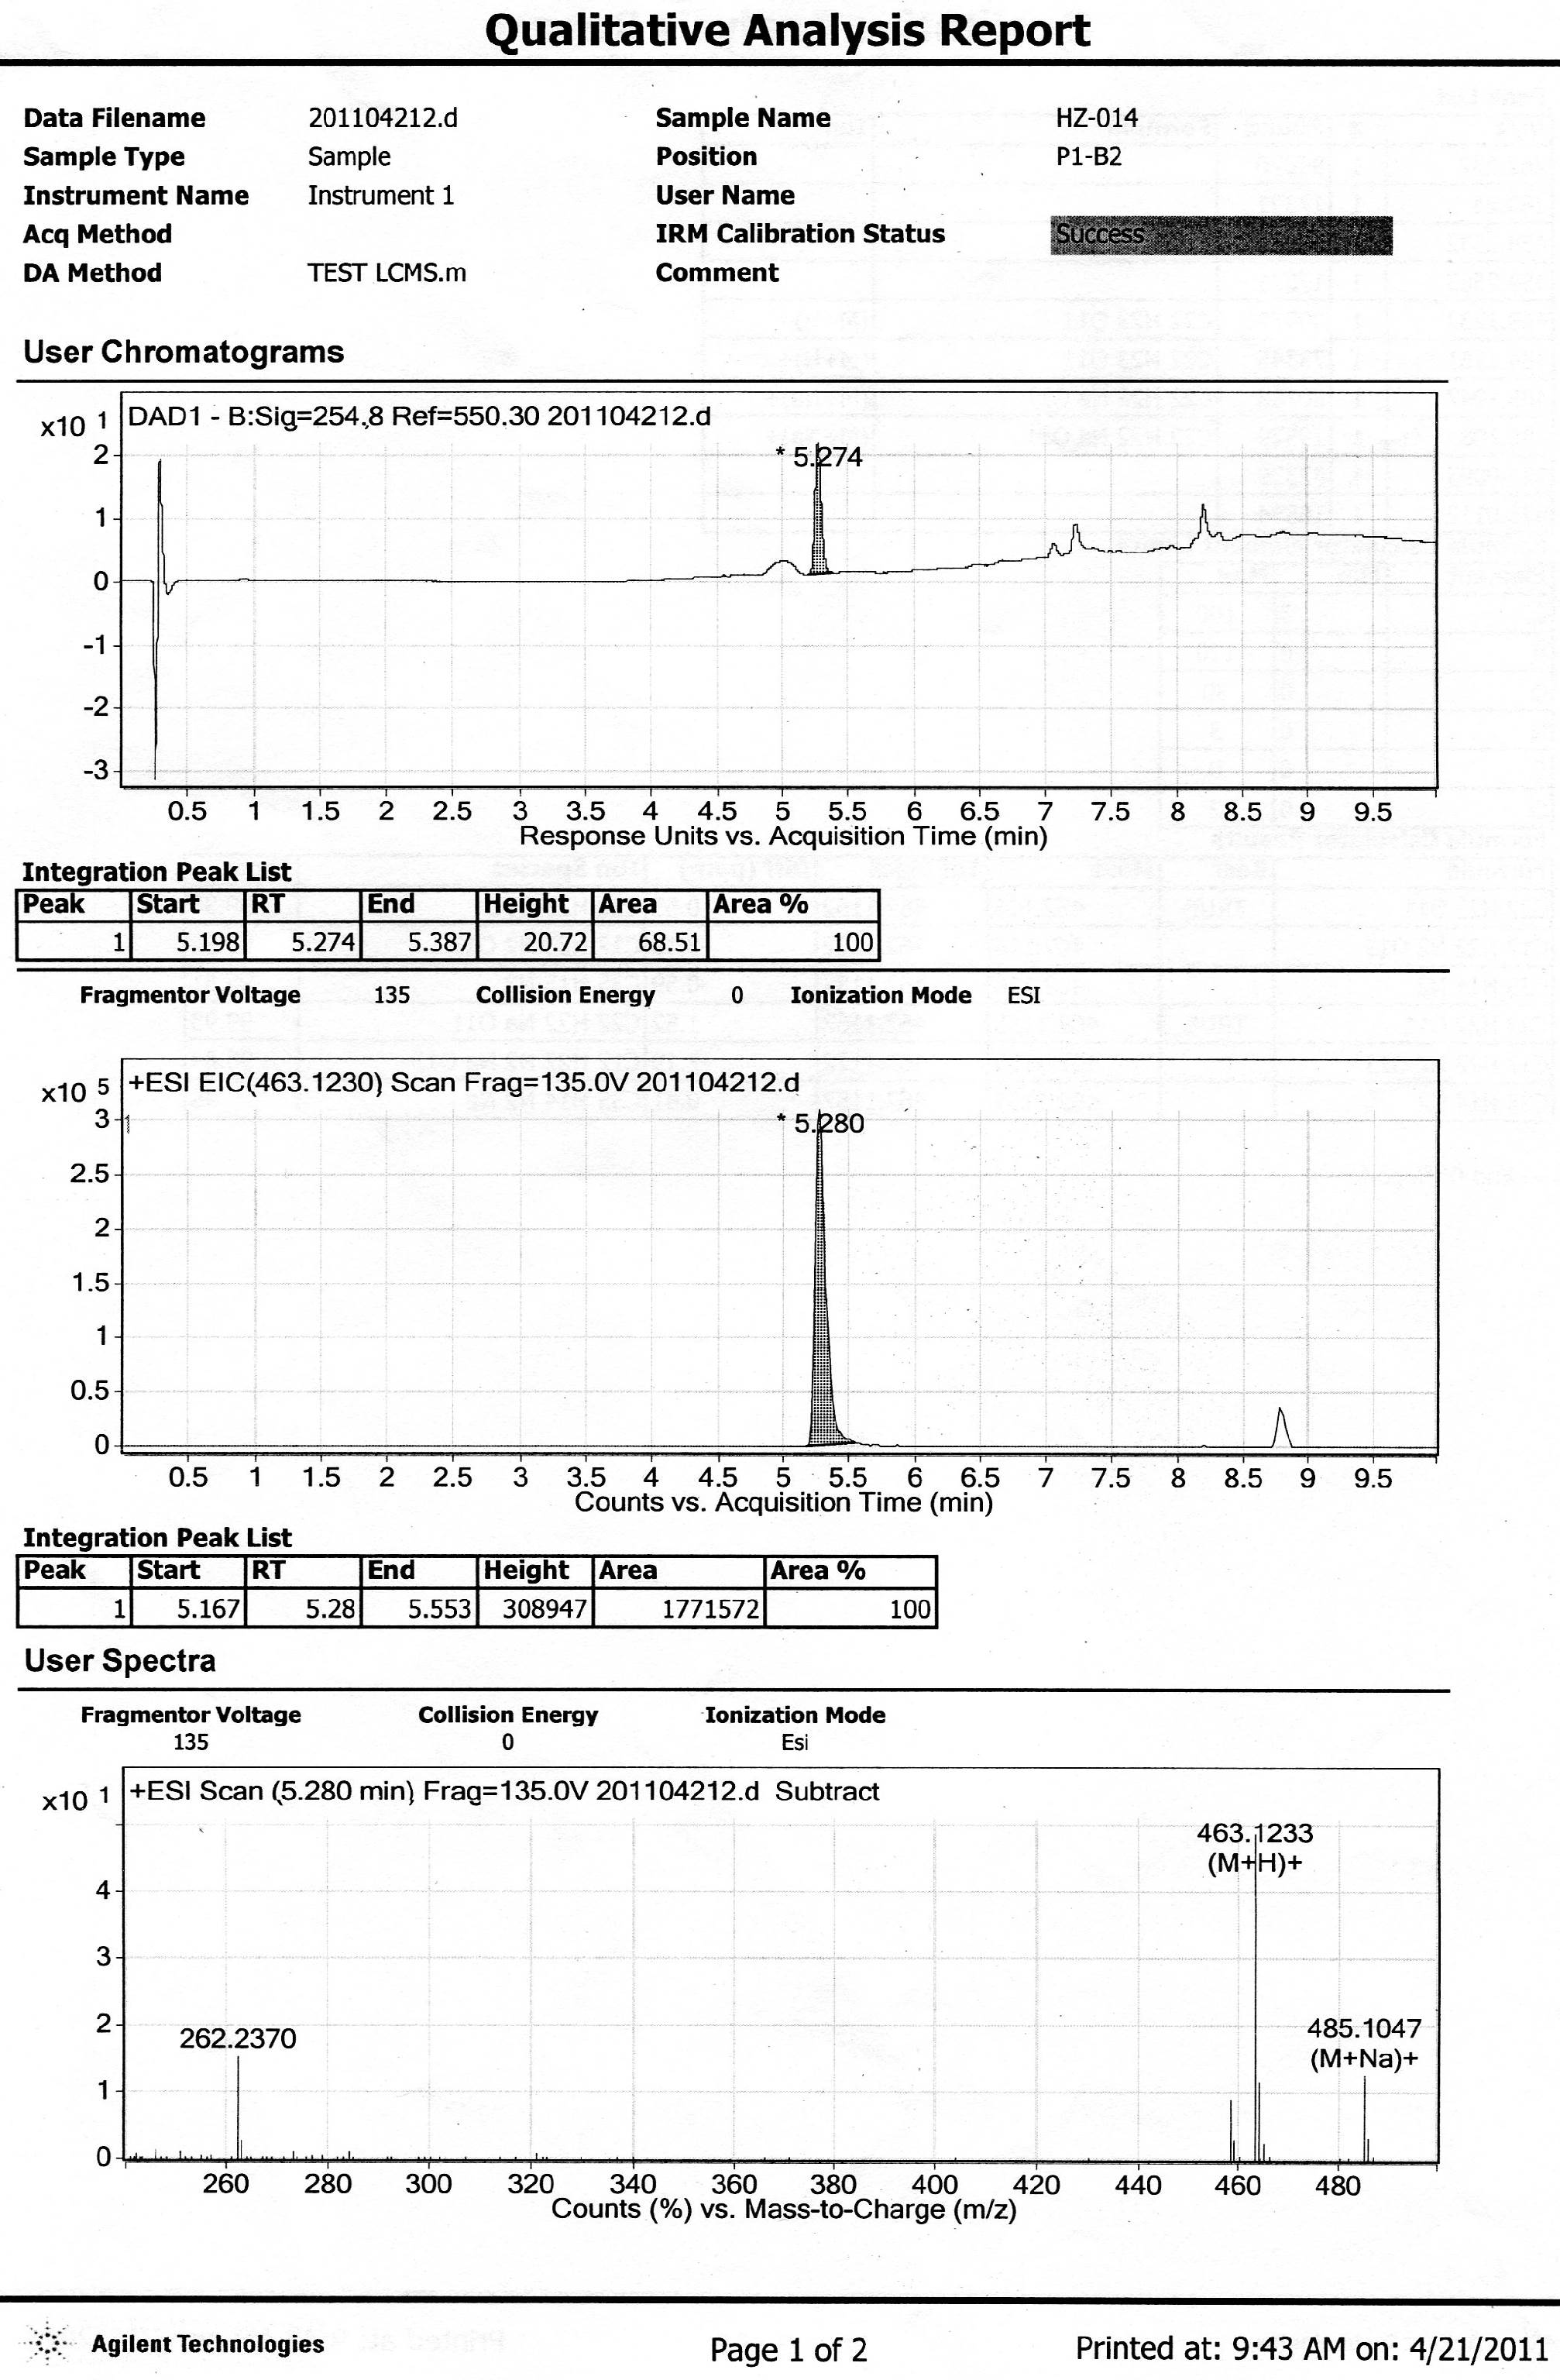


**Figure S14.** HR-ESI-MS spectrum of polyisocoumarin (**3**)


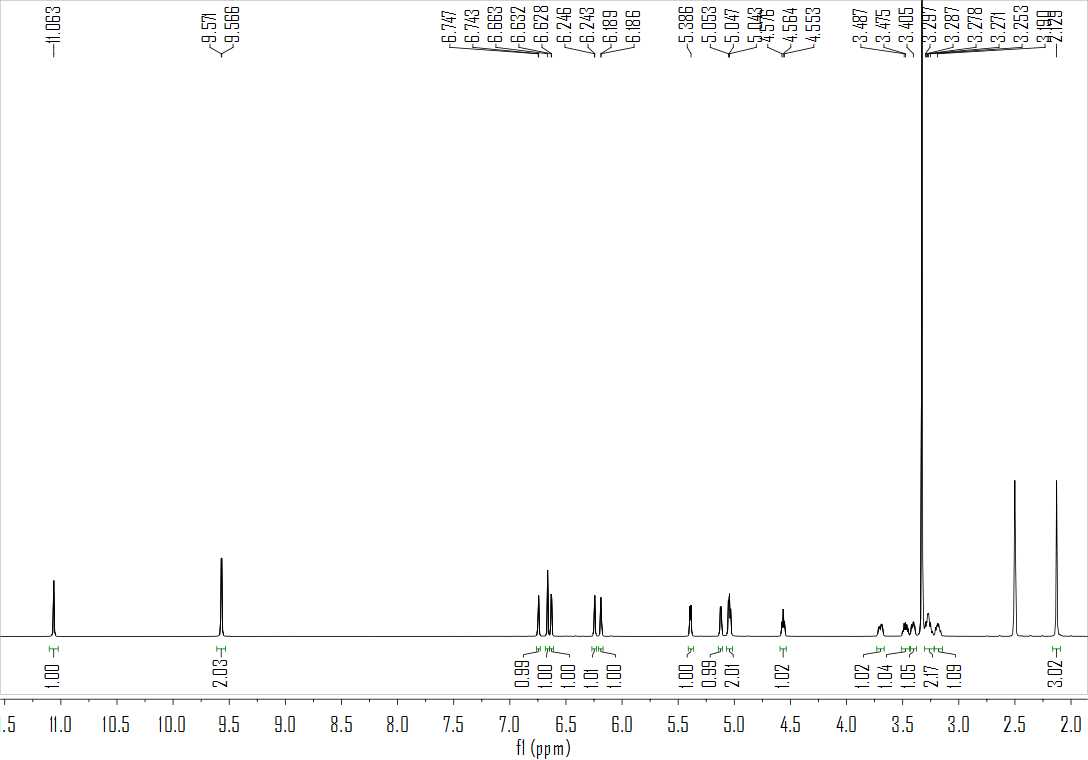


**Figure S15.** 1H NMR spectrum of polyisocoumarin (**3**) in DMSO-*d6*


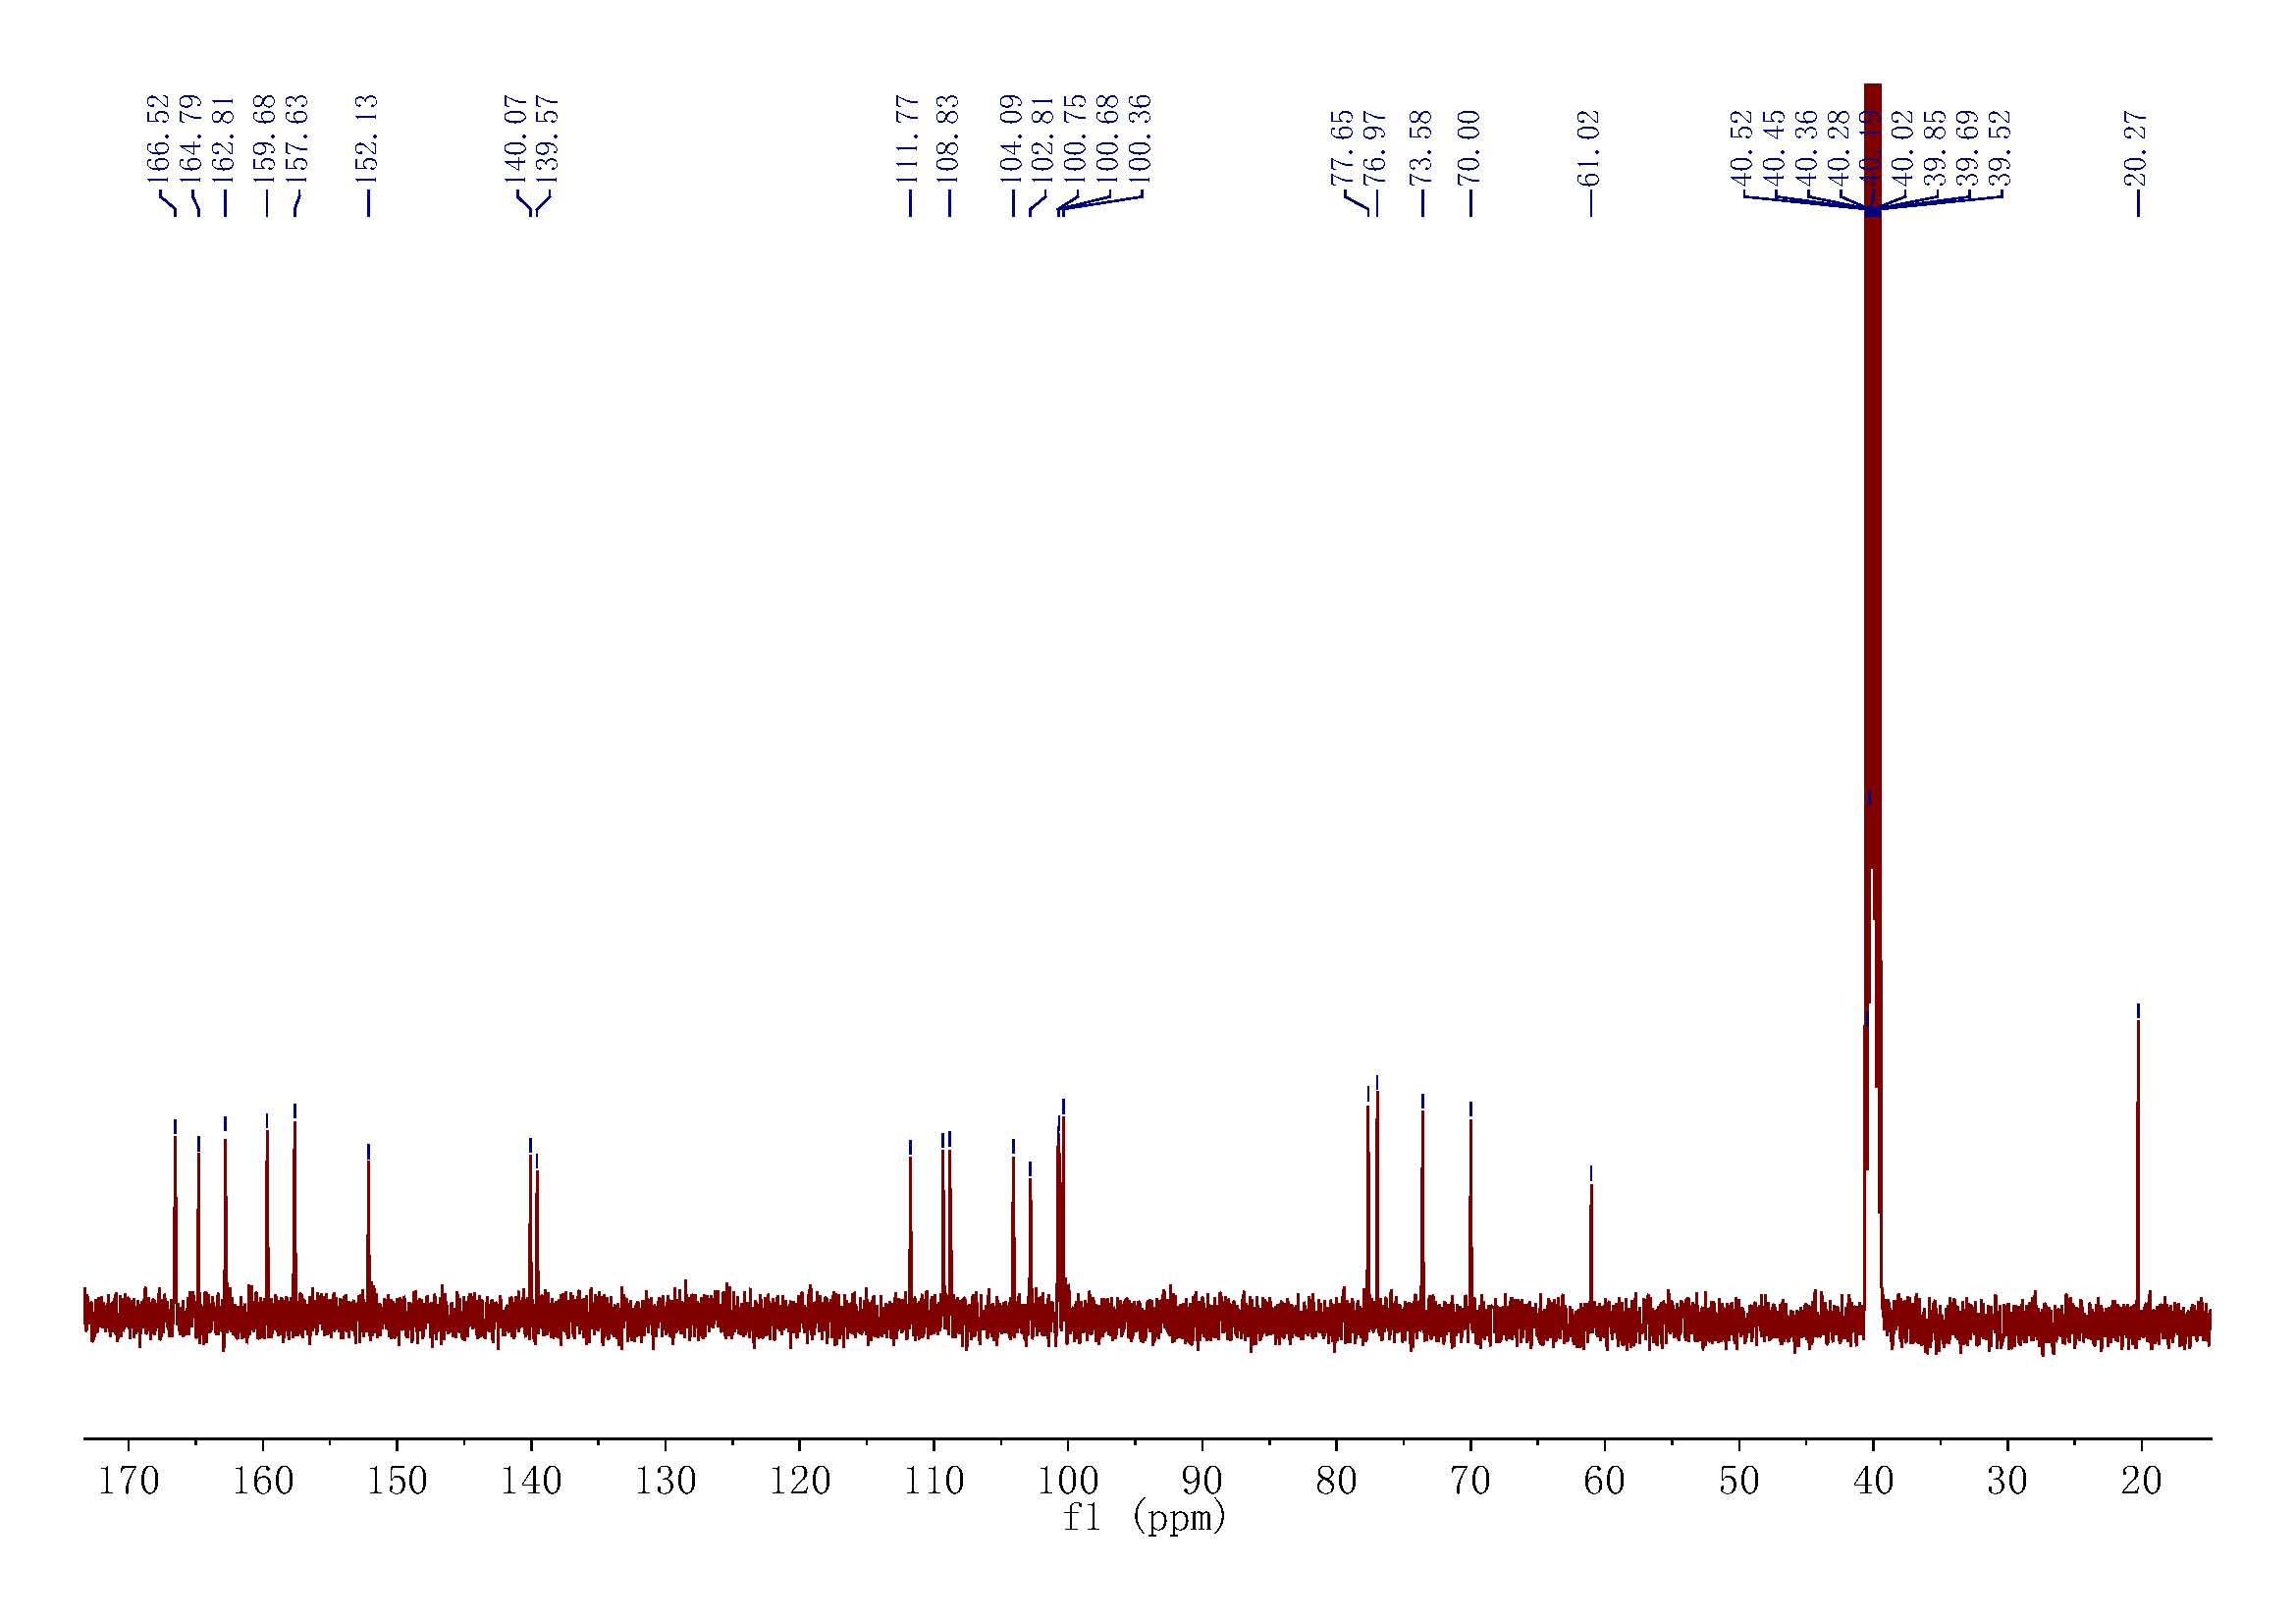


**Figure S16.** 13C NMR spectrum of polyisocoumarin (**3**) in DMSO-*d6*


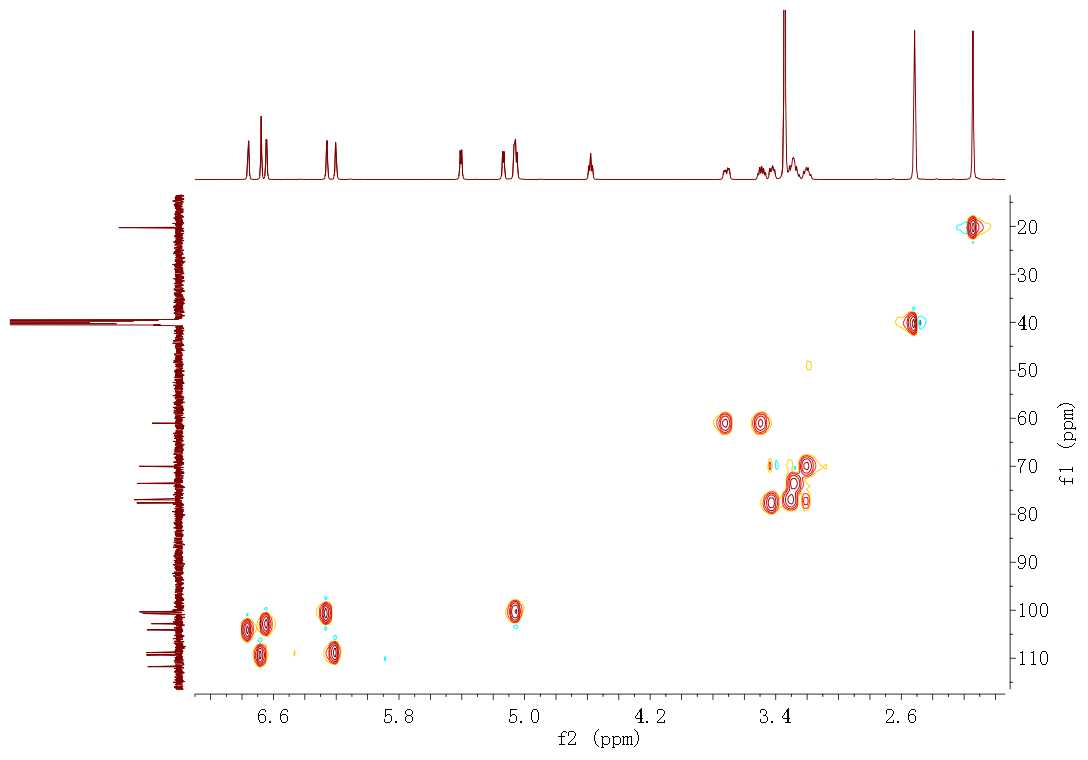


**Figure S17.** HSQC NMR spectrum of polyisocoumarin (**3**) in DMSO-*d6*


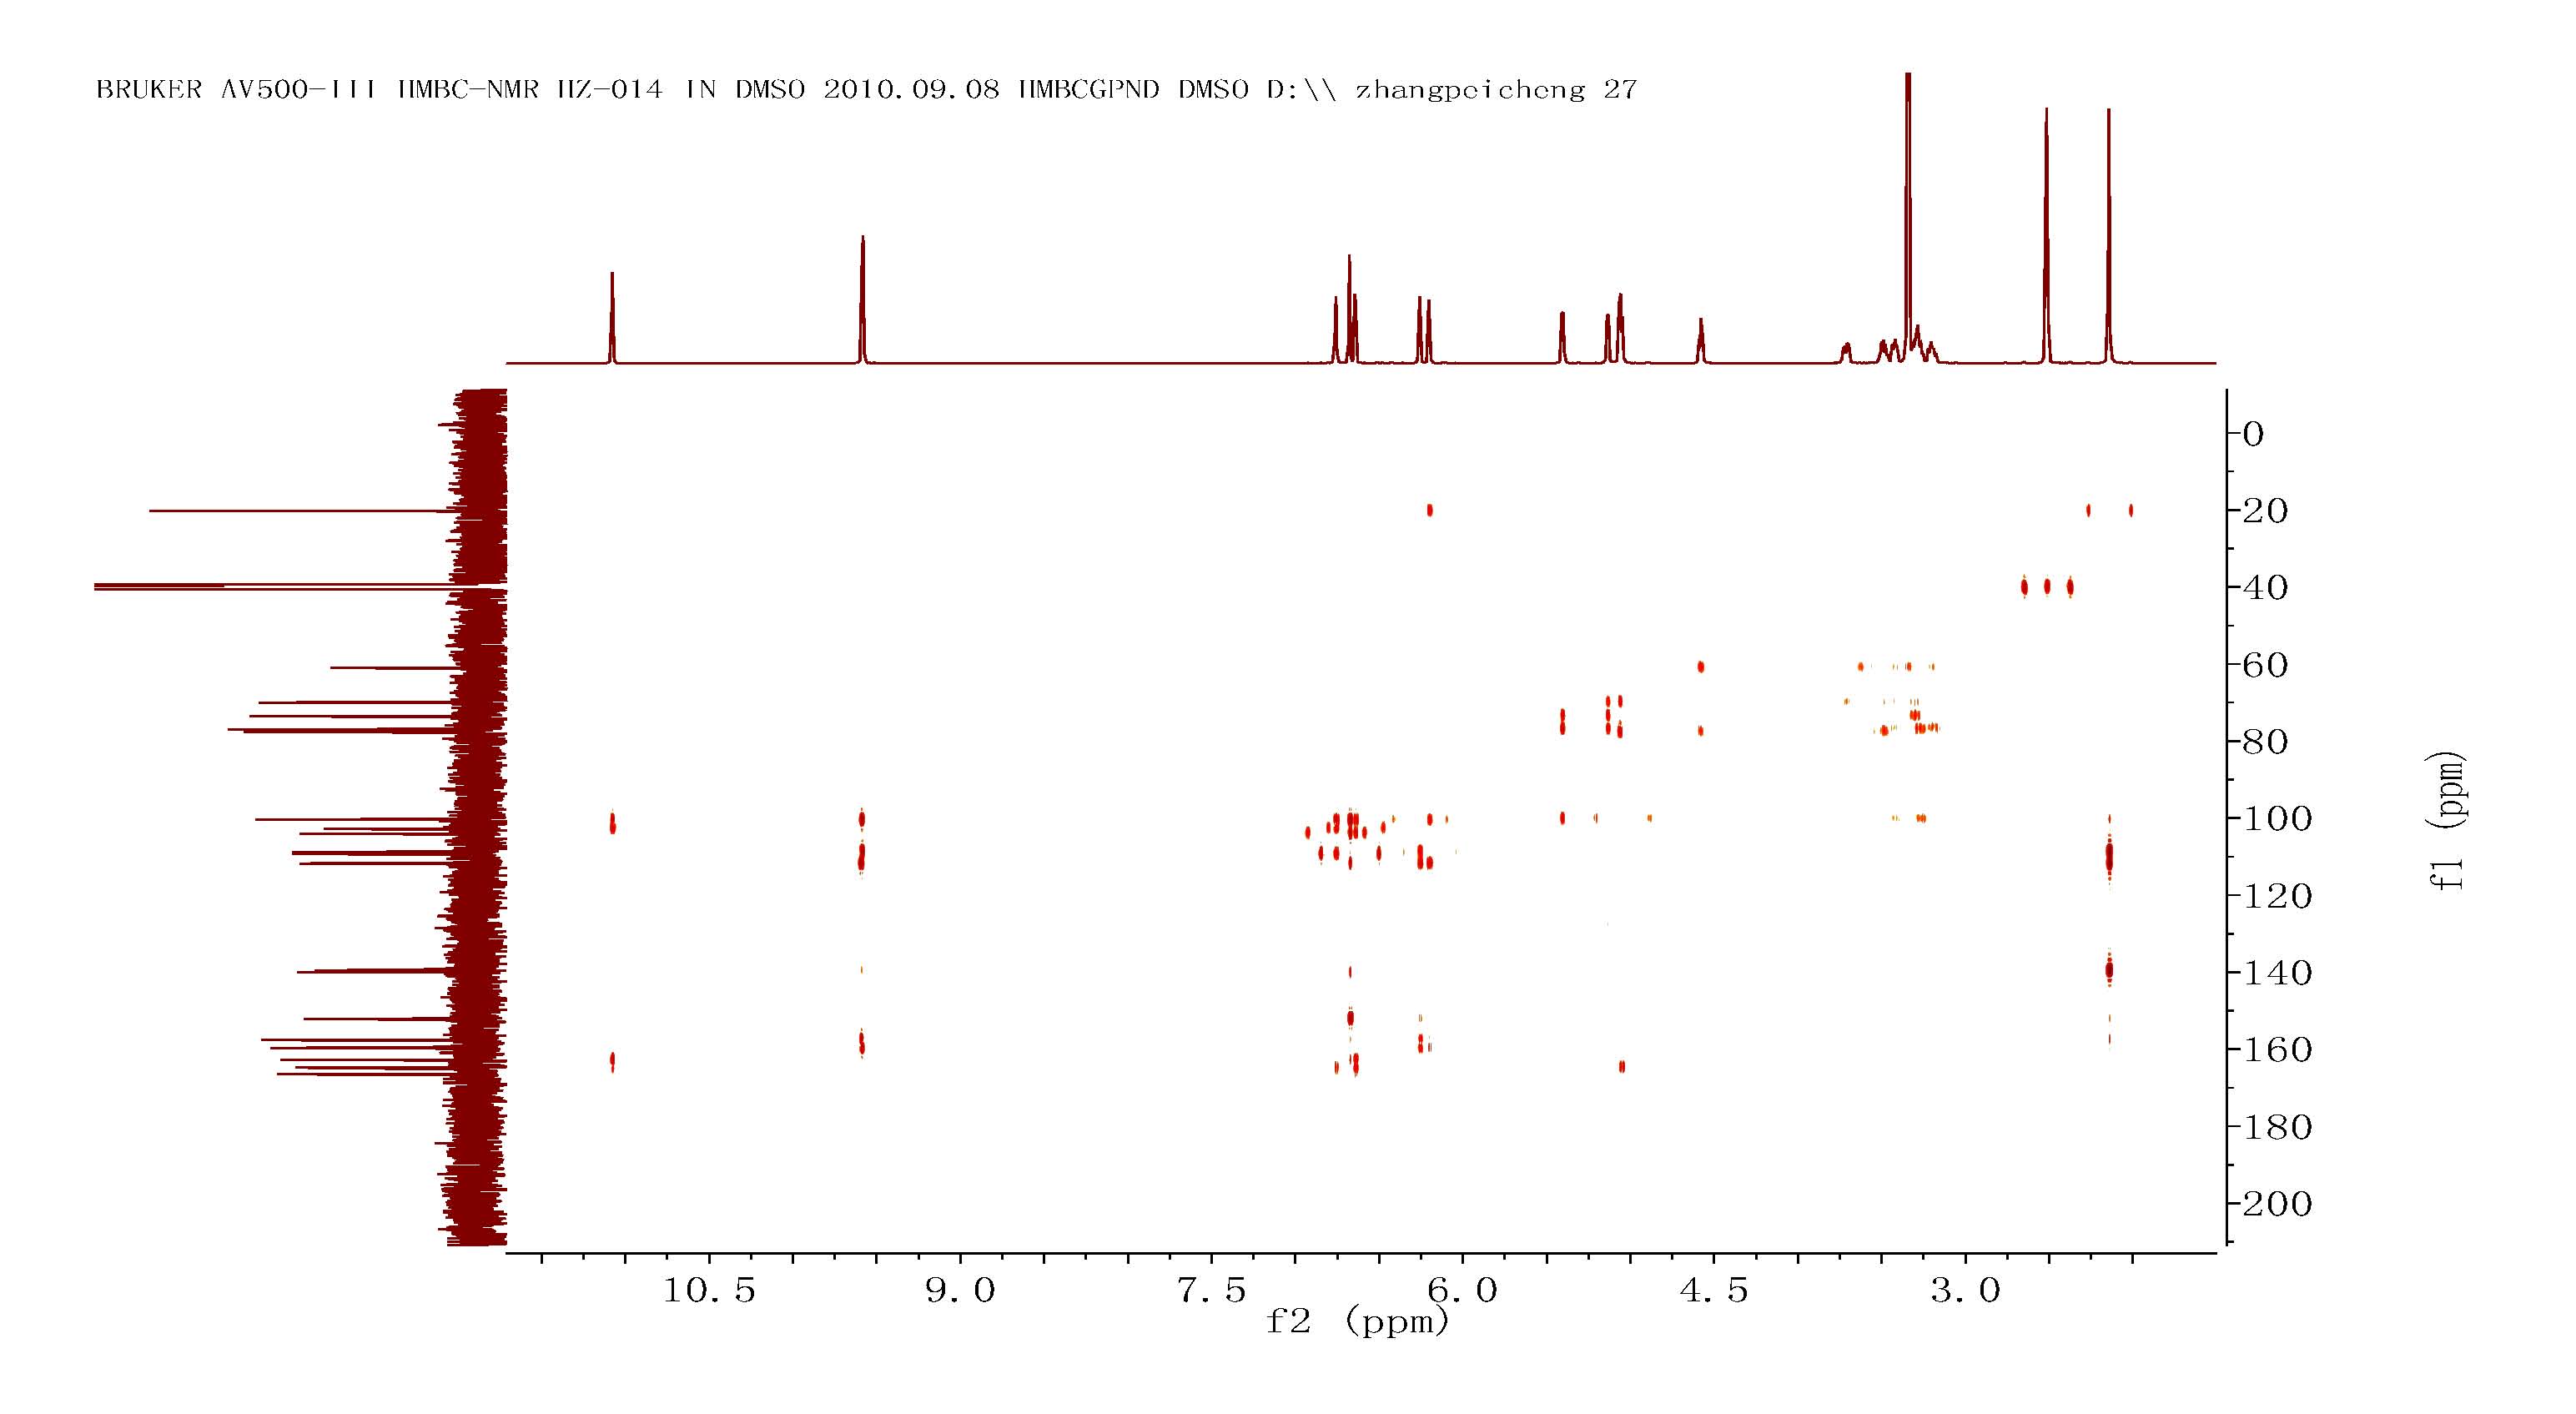


**Figure S18.** HMBC NMR spectrum of polyisocoumarin (**3**) in DMSO-*d6*

**2. Activity assay method**

**2.1.*****PTP1B inhibition***

Recombinant human GST-PTP1B protein was overexpressed by hGST-PTP1B-BL21 *E*. coli and purified by GST affinity chromatography. The reagent pNPP was used as a substrate for the measurement of PTP1B activity. The compounds were preincubated with the enzyme at room temperature for 5 minutes. Assay was performed in the final volume of 100 μL in the active system containing 50 mmol/L HEPES, 5 mmol/L DTT, 150 mmol/L NaCl, 2 mmol/L EDTA, and 2 mmol/L pNPP (pH 7.0). The system was incubated at 30 °C for 10 minutes, and the reaction was stopped by addition of 50 *μ*L 3 mol/L NaOH. Then, the absorbance was determined at 405 nm wavelength. The similar system without GST-PTP1B protein was used as blank. The IC50 value was calculated by nonlinear regression with GraphPad Prism 5.0.

**2.2. *Cytotoxic*** ***activity assay***

Cytotoxicity against human tumor cell was measured in a 5-day MTT test for HCT-8 (human ileocecal carcinoma), Bel7402 (human hepatocellular cancer), BGC823 (stomach adenocarcinoma), A549 (human lung carcinoma), and A2780 (ovary adenocarcinoma) by employing the revised MTT method. Briefly, 1 × 103 cells/100 μL were seeded in 96-well microplates and preincubated for 24 h to allow cell attachment. This medium was then aspirated, and 100 *μ*L of fresh medium containing various concentrations of the test drug were added to the cultures. The cells were incubated with each drug for 5 days. Cell survival was evaluated by adding 50 *μ*L of MTT reagent (5 mg MTT/ml in RPMI 1640 medium) to each well. After 4 h reincubation at 37 °C, 100 μl DMSO were added to dissolve the precipitate of reduced MTT. Microplates were agitated on a rotation platform at room temperature for 15 min, and the absorbance of the reaction mixtures was determined at 570 nm with a multiwell scanning spectrophotometer.
